## REVIEW

# Establishing the pattern of the vertebrate limb

Caitlin McQueen and Matthew Towers\*

## ABSTRACT

The vertebrate limb continues to serve as an influential model of growth, morphogenesis and pattern formation. With this Review, we aim to give an up-to-date picture of how a population of undifferentiated cells develops into the complex pattern of the limb. Focussing largely on mouse and chick studies, we concentrate on the positioning of the limbs, the formation of the limb bud, the establishment of the principal limb axes, the specification of pattern, the integration of pattern formation with growth and the determination of digit number. We also discuss the important, but little understood, topic of how gene expression is interpreted into morphology.

**KEY WORDS:** Limb, Digits, Pattern formation, Growth, Signalling

## Introduction

Limb buds form at reproducible antero-posterior positions on the flank of the embryo and are composed of a multipotent population of undifferentiated cells derived from the somatopleural layer of the lateral plate mesoderm that are ensheathed by an epithelial layer (Tickle, 2015). Limb bud mesoderm cells differentiate into cartilage, perichondrium, dermis, muscle connective tissues, ligaments and tendons, while the epithelium gives rise to the epidermis of the skin (Pearse et al., 2007). The spinal cord and somites also contribute cells that give rise to major tissue types, including the nerves and muscles, respectively.

In this Review, we cover the early stages of limb development, which are important because the axial positions at which the limb buds form relate to their identity. For example, the anterior region of the embryo forms the forelimbs, while the posterior region forms the hindlimbs. Another important aspect is that the limb fields are polarised (i.e. cells in different axial positions have different developmental potential) with respect to both the antero-posterior and dorso-ventral axes of the embryo, well before the limb buds form. Polarisation of the presumptive limb bud establishes signalling centres in the outgrowing bud, which specify the pattern of structures along each of its principal axes: antero-posterior (thumb to little finger) (Fig. 1A); proximo-distal (shoulder to fingertips) (Fig. 1B) and dorso-ventral (knuckle to palm) (Fig. 1C). Vertebrate limb anatomy along the proximo-distal axis comprises an invariant pattern of stylopod (i.e. humerus), zeugopod (i.e. radius/ulna) and autopod (wrist/digits) (Fig. 1D). However, along the antero-posterior axis digit number varies (i.e. three in the chick wing, four in the chick leg and five in mouse/human limbs) (Fig. 1D). Although it remains controversial, considerable effort has

been invested into understanding how signals specify the pattern of limb structures along each of the primary axes. We will see for the proximo-distal axis that a coherent model is emerging from chick and mouse studies; however, there are differences for the antero-posterior axis, and the dorso-ventral axis has not been explored in as much detail. One of the areas that is least understood is how positional information (instructions received by cells to determine how they differentiate in respect to their position relative to other parts of the body) is interpreted into patterns of gene expression that determine anatomy, and we highlight recent attempts to gain insights into this problem. We focus on the molecular regulation of mouse and chick limb patterning where most progress is still being made, and the reader is directed towards other recent reviews that focus on clinical and evolutionary aspects (Pickering and Towers, 2014; Saxena et al., 2017).

## Limb positioning

Vertebrate limbs form at distinct and reproducible locations along the main body axis. Forelimbs always form at the cervico-thoracic vertebrae boundary and hindlimbs at the lumbar-sacral boundary. The relative position at which these boundaries are found varies greatly between vertebrates (Table 1), and this has contributed greatly to the differences in the extent of body extension observed across evolution.

Classical fate-mapping and tissue transplantation experiments in the chick embryo have revealed that cells in distinct regions of the lateral plate mesoderm (LPM) are in position to form the limbs as early as the 2-somite stage (Chaube, 1959; Rosenquist, 1971). Candidates for specifying the position of the limbs include Hox (homeobox) family genes, which are expressed in gastrulating cells, and later along the antero-posterior axis of the LPM. Hox genes are expressed in the order in which they are found on the chromosome in the 3'-5' direction – a process called spatial and temporal colinearity (Box 1). Indeed, it has long been suspected that Hox proteins are important determinants of forelimb position, because the functional inactivation of *Hoxb5* in the mouse repositions the forelimbs anteriorly (Rancourt et al., 1995). Recent evidence from the chick has suggested that the determination of forelimb position coincides with when *Hox4-Hox9* paralogous group genes are first expressed in gastrulating cells (Moreau et al., 2019) (Fig. 2A). For example, the overexpression of a dominant-negative form of *Hoxb4* in chick mesoderm cells causes an anterior shift of the forelimb (Moreau et al., 2019). By contrast, the overexpression of *Hoxb4*, together with a dominant-negative form of *Hoxc9* in the interlimb at around the 20-somite stage, shifts the position of the wing bud posteriorly (Fig. 2B). This experiment was performed after the onset of endogenous Hox gene expression, therefore suggesting that earlier positional information can be re-specified. However, the overexpression of the dominant-negative version of *Hoxc9* alone has no effect, indicating that both active repression and activation of target genes by Hox proteins is crucial for determining limb position. In a broader context, the timing of *Hoxb4* expression correlates with the position of the forelimb in a range of avian

Department of Biomedical Science, University of Sheffield, Western Bank, Sheffield S10 2TN, UK.

\*Author for correspondence (m.towers@sheffield.ac.uk)

 M.T., 0000-0003-2189-4536

This is an Open Access article distributed under the terms of the Creative Commons Attribution License (<https://creativecommons.org/licenses/by/4.0>), which permits unrestricted use, distribution and reproduction in any medium provided that the original work is properly attributed.

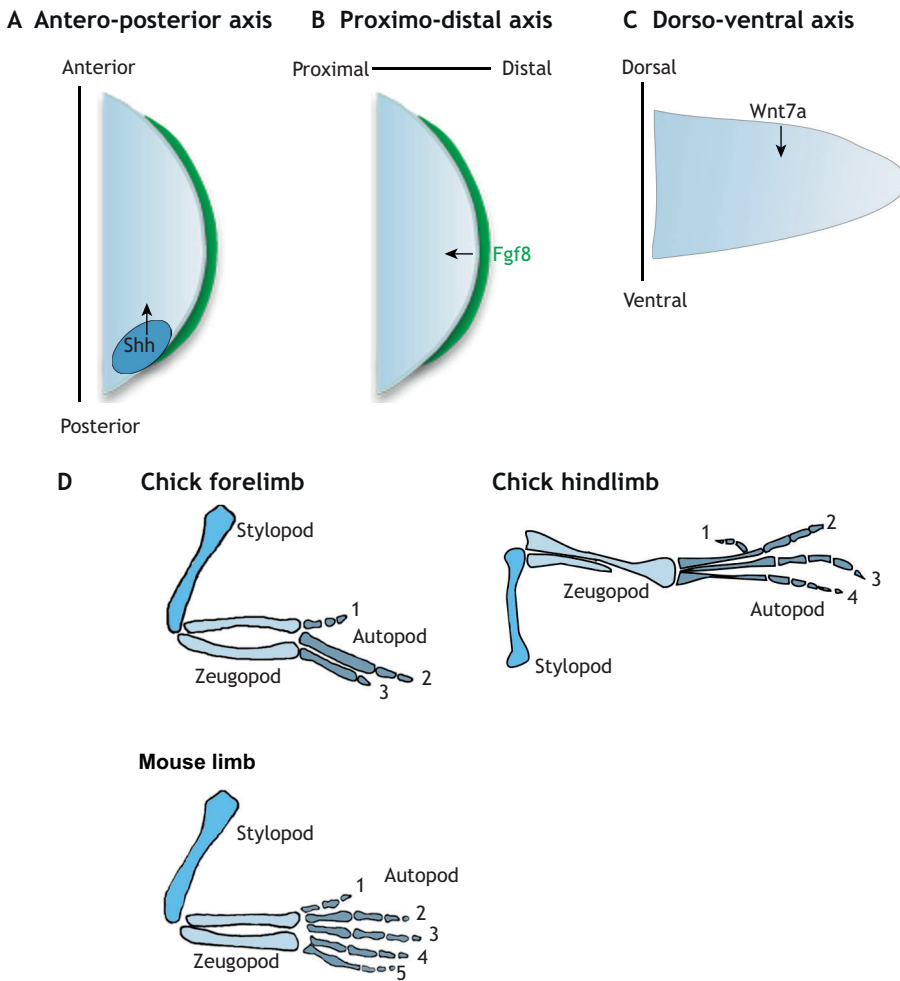

**Fig. 1. Limb axes.** (A) The antero-posterior axis (thumb to little finger). Sonic hedgehog (Shh) is produced by the polarising region (blue) at the posterior margin of the limb and is involved in antero-posterior patterning. (B) The proximo-distal axis (shoulder to fingertips). Initial outgrowth of the limb is driven by the Fgf10-Fgf8 feedback loop that operates between the mesoderm (blue) and overlying apical ectodermal ridge (green). (C) The dorso-ventral axis (knuckle to palm). Wnt7a acts as a dorsalisating signal produced by the overlying dorsal ectoderm. (D) Limb anatomy overview. The proximo-distal axis of vertebrate limbs comprises a conserved pattern of stylopod (i.e. humerus), zeugopod (i.e. radius and ulna) and autopod (i.e. wrist and digits). Digit number varies along the antero-posterior axis in vertebrates (i.e. three in the chick wing, four in the chick leg and five in mouse limbs).

species, including the ostrich and zebra finch (Moreau et al., 2019). The expression of Hox genes is influenced by the distribution of retinoic acid (RA), which is higher in anterior regions of the elongating trunk compared with posterior regions (Langston and Gudas, 1994), and treatment of chick embryos with RA, or antagonists of RA signalling, shifts *Hoxb4* expression posteriorly and anteriorly, respectively (Moreau et al., 2019).

A recent study in mice has indicated that Oct4 indirectly controls forelimb position by repressing posterior 5' Hox genes (*Hox10-Hox13* paralogues), because the inactivation of *Oct4* precociously activates the posterior programme of embryo development and results in posterior truncations (Fig. 2A,B), which, in less severe cases, can cause the hindlimb to form next to the forelimb (DeVeale et al., 2013). Conversely, when the duration of *Oct4* expression is extended, more-posterior development of the

embryo is delayed, which elongates the trunk (Aires et al., 2016). These effects are associated with corresponding changes in the timing of Hox gene expression along the antero-posterior axis of the embryo.

The position of presumptive hindlimb cells is determined later than forelimb cells (Tickle, 2015). Genetic studies have also implicated Hox genes in hindlimb positioning, because deletion of *Hoxc8* in the mouse results in the posterior repositioning of the hindlimbs (van den Akker et al., 2001). A role for the TGFβ family member growth/differentiation factor 11 (*Gdf11*) in specifying the posterior body plan upstream of Hox genes has also been revealed (Fig. 2C). Thus, when *Gdf11* expression is inactivated in the mouse, the trunk is extended (McPherron et al., 1999; Jurberg et al., 2013). Conversely, when *Gdf11* is prematurely activated in the axial mesoderm, the trunk is shortened and the hindlimb forms next to the forelimb (Jurberg et al., 2013). Similarly, when the onset of *Gdf11* expression is advanced or delayed in the posterior axial mesoderm of chick embryos at the 9-10-somite stage, the position of the hindlimb is shifted either anteriorly or posteriorly, respectively (Matsubara et al., 2017) (Fig. 2D). Furthermore, the timing of *Gdf11* expression in the posterior axial mesoderm strongly correlates with the antero-posterior position at which the hindlimb develops in a range of species, including frogs, mice, chickens and snakes (Matsubara et al., 2017) (Table 1). *Gdf11* signalling regulates the onset of *Hox9-Hox13* expression in both posterior axial mesoderm, where it is expressed, and in the adjacent LPM at about the 10-somite stage of chick development (Matsubara et al., 2017). In

**Table 1. Limb position in different vertebrates**

| Species             | Cervico-thoracic vertebrae position | Lumbar-sacral vertebrae position |
|---------------------|-------------------------------------|----------------------------------|
| African clawed frog | 2                                   | 10                               |
| Axolotl             | 3                                   | 17                               |
| Python              | 3                                   | 282                              |
| Mouse               | 8                                   | 23                               |
| Human               | 8                                   | 25                               |
| Chicken             | 15                                  | 27                               |
| Emu                 | 18                                  | 36                               |

**Box 1. Hox gene regulation**

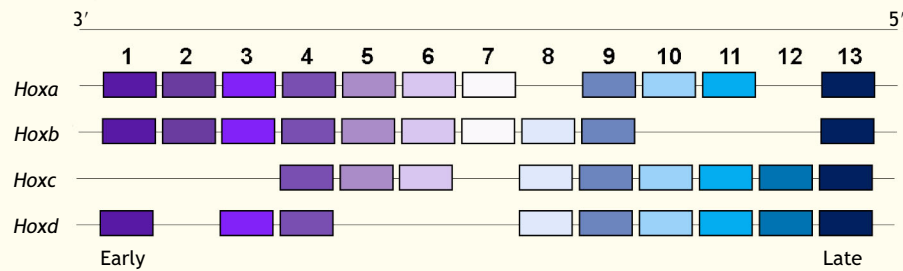

**Early phase Hoxd expression**

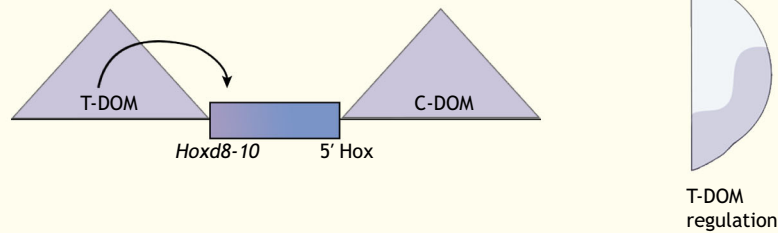

**Late phase Hoxd expression**

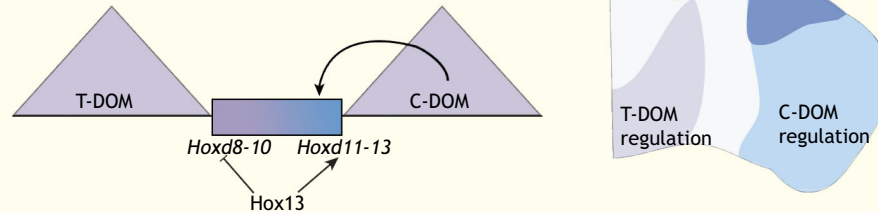

Hox genes encode a subfamily of homeobox transcription factors, each containing a conserved DNA-binding domain known as a homeodomain, which consists of a helix-turn-helix motif. Hox genes are closely localised within their respective chromosomes and are arranged into four main clusters: Hoxa-Hoxd. Hox gene transcription displays colinearity, whereby the order in which the genes are expressed along the antero-posterior axis of the body and proximo-distal axis of the limb, relates to their order along the chromosome. Two topologically associated domains (TADs) – regions of chromatin with specific 3D structures – flank the Hoxd gene cluster at its 3' and 5' ends: telomeric (T-DOM) and centrosomal (C-DOM), respectively. The switch from T-DOM to C-DOM regulation drives the transition from 3' *Hoxd8-Hoxd10* expression during early proximal patterning to 5' *Hoxd11-Hoxd13* expression during late distal patterning (Andrey et al., 2013). Studies using *Hox13* mutants have revealed that Hoxa13 (later cooperatively with Hoxd13) represses the T-DOM regulatory region by recruiting polycomb repressor complex proteins and this maintains the activity of the 5' C-DOM regulatory region (Beccari et al., 2016; Rodríguez-Carballo et al., 2019). In addition, Hoxa13 and Hoxd13 drive the expression of an antisense *Hoxa11* transcript, which confines *Hoxa11* to more-proximal regions (Kherdjemil et al., 2016).

addition, in the mouse, *Gdf11* is likely to repress the anterior programme by suppressing RA signalling via its regulation of the gene encoding the RA-catabolising enzyme *Cyp26a1*, which is then expressed in the prospective LPM (Fig. 2C) (Lee et al., 2010; Moreau et al., 2019). Therefore, *Oct4* and *Gdf11* play opposing roles in specifying the basic body plan (anterior versus posterior), upstream of the Hox genes that confer axial identity to these broad regions (Mallo, 2018) (Fig. 2). It remains unclear how *Oct4* and *Gdf11* influence the expression of Hox genes and whether this involves interaction with different enhancers, as is the case for *Hoxd* expression during later limb development (Box 1). Therefore, these studies reveal a hierarchical regulation of antero-posterior patterning of the embryo and the positioning of the limbs. In the first step, *Oct4* and *Gdf11* specify broad regions of the embryo as anterior and posterior, and then Hox genes act downstream to provide local identity (i.e. lumbar versus sacral) (Aires et al., 2016).

**Limb polarity**

Once cells are in position to form limbs along the antero-posterior axis of the embryo, they become polarised along two developmental axes. 180° tissue rotation experiments in the chick embryo have shown that the antero-posterior polarity and dorso-ventral polarity of the limb is determined in the LPM at pre-limb bud stages: at the 9- to 10- and 13-somite stages, respectively (Chaube, 1959; Michaud et al., 1997). The establishment of antero-posterior polarity results in the formation of the polarising region (or zone of polarising activity, ZPA) – a group of posterior limb bud mesoderm cells that express *Shh* (sonic hedgehog), which pattern the antero-posterior axis. A distant cis-regulatory sequence containing multiple enhancers called the ZPA regulatory sequence (ZRS) controls *Shh* expression (Box 2).

In the mouse, the products of Hox genes specify the antero-posterior polarity of the developing forelimb field (Fig. 3A), just as they specify antero-posterior position along the main body axis.

**A Forelimb positioning**

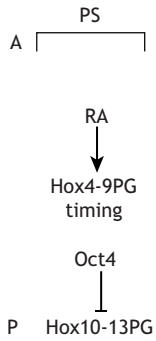

**B**

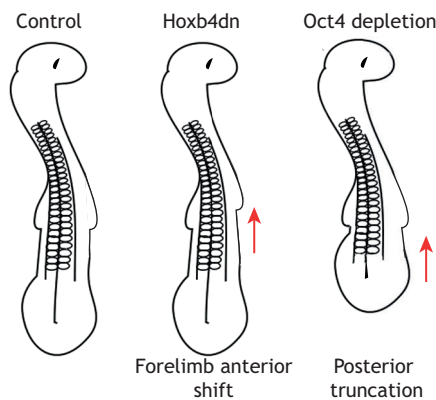

**C Hindlimb positioning**

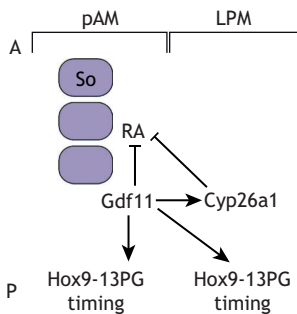

**D**

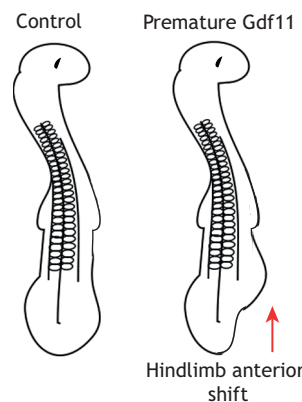

**Fig. 2. Limb positioning.** (A) Major regulatory interactions involved in forelimb field positioning. Anteriorly enriched retinoic acid (RA) in the primitive streak (PS) influences the expression of *Hox4-Hox9* paralogous group (PG) genes in the prospective lateral plate mesoderm (LPM) of the primitive streak. *Oct4* represses hindlimb-associated 5' *Hox* genes in the primitive streak. (B) Alterations to limb positioning as a result of embryonic manipulations of *Hoxb4* or *Oct4* expression. Expression of a dominant-negative version of *Hoxb4* in the chick results in an anterior shift in the positioning of the forelimb, while inactivation of *Oct4* in the mouse results in posterior truncations so that the hindlimb forms next to the forelimb. (C) Major regulatory interactions involved in hindlimb field positioning. *Gdf11* in the posterior axial mesoderm (pAM) regulates the onset of *Hox9-Hox13* paralogue expression. *Gdf11* represses the anterior forelimb programme by suppressing RA signalling via induction of the retinoic acid catabolising enzyme *Cyp26a1* in the LPM. (D) Premature *Gdf11* expression in both mice and chicks shifts the position of the hindlimb anteriorly. A, anterior; P, posterior; So, somites.

Deletion of all *Hox9* paralogous group genes in the mouse embryo results in the loss of posterior polarity, and the failure to establish *Shh* expression in the polarising region via an intermediate transcription factor, heart- and neural crest derivatives-expressed protein 2 (*Hand2*) (Xu and Wellik, 2011). Conversely, deletion of all *Hox5* paralogous

group genes results in the loss of anterior polarity, and *Shh* expression becomes detectable at the anterior margin of the limb bud (Xu et al., 2013). *Hox5* proteins regulate expression of the gene encoding the promyelocytic leukaemia zinc-finger protein (*Plzf*) transcription factor, which represses *Shh* expression and the formation of an anterior polarising region (Xu et al., 2013). *Sall4* is involved in the anterior regulation of *Gli3* that encodes the major transcriptional effector of *Shh* signalling. *Gli3*-dependent transcription in the anterior part of the limb is inhibited by *Gata4* and *Gata6* transcription factors that promote its repressor function (Hayashi et al., 2016). *Gata4* and *Gata6* also contribute to the direct suppression of *Shh* in the anterior part of the limb (Kozhemyakina et al., 2014). Antero-posterior polarity is maintained because *Hand2*, which is expressed in the posterior part of the limb bud and regulates *Shh* expression directly, also mutually inhibits *Gli3* expression posteriorly (te Welscher et al., 2002a). In addition, RA signalling is involved in specifying antero-posterior polarity by its regulation of anterior *Hox5-Hox9* paralogous genes and posterior *Hand2* expression in presumptive forelimb regions (Fig. 3A).

The antero-posterior polarity of the presumptive hindlimb is also specified at early stages and does not appear to involve Hox genes, but instead involves regionalised transcription factors (Fig. 3B). For example, islet 1 (*Isl1*) is indirectly involved in the initiation of *Shh* expression in the posterior part of the limb via its induction of posterior *Hand2* expression (Itou et al., 2012), while *Sall4*, and members of the Iroquois transcription factor family (*Irx3* and *Irx5*), stimulate *Gli3* expression anteriorly (Akiyama et al., 2015; Li et al., 2014). In addition, as in the forelimb, *Gata6* represses *Shh* expression in the anterior part of the hindlimb (Kozhemyakina et al., 2014) (Fig. 3B).

**Box 2. *Shh* gene regulation**

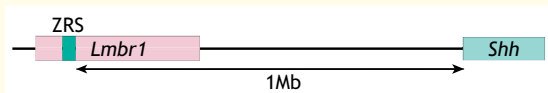

Limb-specific expression of *Shh* is regulated by elements within the distant ZPA regulatory sequence (ZRS), which lies within an intron of the *Lmbr1* gene ~1Mb away from the *Shh* gene. 3D-fluorescence *in situ* hybridisation (3D-FISH) has revealed that this long-range enhancer colocalises with the *Shh* promoter when *Shh* is activated in the limb (Williamson et al., 2016). Multiple transcription factors bind to the ZRS, and their interaction spatially and temporally refines *Shh* expression. Binding sites for both *Hand2* and Hox transcription factors are found in the ZRS, and deletion of these elements results in absence of *Shh* expression (Lettice et al., 2017). The zinc-finger transcription factor *Plzf*, together with *Gata4*, *Gata6* and *Hox5* family members, suppress the expression of *Shh* at the anterior margin of the limb (Xu et al., 2013; Hayashi et al., 2016). *Fgf* signalling upregulates the expression of ETS translocation variant transcription factors, *Etv4* and *Etv5*, which bind to the ZRS and restrict the size of the domain of *Shh* expression, while posteriorly expressed ETS1/*GABP* $\alpha$  interact with additional sites in the ZRS to activate *Shh* expression (Lettice et al., 2012). See Lettice et al. (2017) for approximate locations of binding sites within the ZRS.

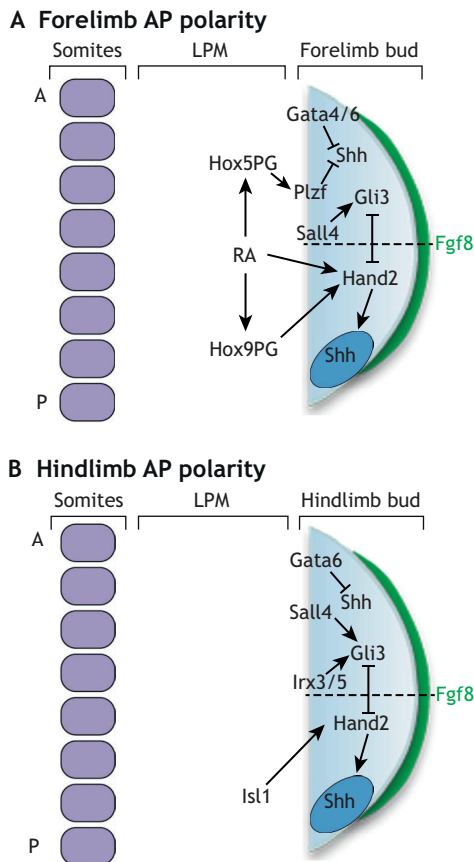

**Fig. 3. Antero-posterior limb polarity.** (A) Major regulatory interactions involved in the specification of forelimb field antero-posterior polarity. Retinoic acid (RA) signalling is implicated in the defined anterior to posterior order of expression of *Hox5-Hox9* paralogous group (PG) genes in presumptive forelimb regions of the lateral plate mesoderm (LPM). *Hox5* PG proteins repress anterior *Shh* expression indirectly through activation of *Plzf*. *Gata4* and *Gata6* proteins transcriptionally inhibit *Shh* and attenuate *Shh* signal transduction by promoting the repressor form of *Gli3*. RA stimulates the posterior expression of *Hand2*, the product of which both represses *Gli3* in the posterior part of the limb bud and stimulates *Shh* expression at the posterior margin. *Gli3* also represses *Hand2*. *Sall4* is expressed in the presumptive forelimb and its protein product contributes to the expression of *Gli3*. (B) Major regulatory interactions involved in the specification of hindlimb field antero-posterior polarity. *Gata6* directly represses anterior expression of *Shh*. *Sall4*, *Irx3* and *Irx5* regulate *Gli3* expression anteriorly. *Isl1* indirectly promotes the posterior expression of *Shh* in the hindlimb by inducing *Hand2*, which represses *Gli3* in the posterior part of the hindlimb. A, anterior; P, posterior.

The establishment of dorso-ventral polarity in the ectoderm of the trunk of the embryo involves bone morphogenetic protein (Bmp) signalling from the mesoderm, which is graded in the chick due to the action of its inhibitor, noggin (Nog), produced by the somites (Pizette et al., 2001). The cells that coalesce at the boundary between dorsal and ventral ectoderm of the trunk will become the apical ectodermal ridge: a thickening of the epithelium at the distal tip of the limb that is essential for and supports outgrowth along the proximo-distal axis (Fig. 1B) (Altabef et al., 1997; see Tickle, 2015 for additional detail). The dorso-ventrality of the ectoderm will be transferred to underlying limb mesoderm cells once they begin to form buds (see the section ‘Dorso-ventral specification’). Thus, polarisation triggers outgrowth of the limb away from the body wall and allows signalling centres to be established at early limb bud stages.

### Limb bud initiation

Following the establishment of limb field polarity, the genes encoding the T-box transcription factors *Tbx4* and *Tbx5* are activated in the LPM. In the mouse, *Tbx4* and *Tbx5* are essential for fibroblast growth factor 10 (Fgf10)-dependent limb initiation (Agarwal et al., 2003; Ng et al., 2002), which depends on a reciprocal feedback loop operating between the mesoderm (Fgf10) and apical ectodermal ridge (Fgf8) (Fig. 4). Both *Fgf8* and *Fgf10* are essential for mouse limb development (Sekine et al., 1999; Mariani et al., 2008; Min et al., 1998; Ohuchi et al., 1997; Xu et al., 1998), and the implantation of an Fgf-soaked bead into the interlimb of a chick embryo is sufficient to induce limb outgrowth (Cohn et al., 1995). In addition, Wnt signalling and genes encoding the *Sp6* and *Sp8* transcription factors are important intermediates involved in establishing the Fgf10-Fgf8 loop at early stages of mouse limb development (Barrow et al., 2003; Haro et al., 2014; Kawakami et al., 2001).

The mechanism that controls the onset of *Tbx4* and *Tbx5* expression in the LPM – corresponding to the 19- to 20-somite stage of chick development (Saito et al., 2002) – differs between forelimbs and hindlimbs (reviewed by Sheeba and Logan, 2017). Transgenic mouse studies have implicated *Hox4* and *Hox5* paralogues, Wnt/ $\beta$ -catenin signalling and RA signalling in regulating forelimb *Tbx5* expression via specific regulatory elements located in *Tbx5* intron 2 (Minguillon et al., 2012; Nishimoto et al., 2014, 2015) (Fig. 4A). However, deletion of these elements by CRISPR/*Cas9* gene editing in the mouse does not abolish *Tbx5* expression (Cunningham et al., 2018). By contrast, mouse studies have suggested that RA signalling indirectly regulates *Tbx5* by repressing *Fgf8* in axial tissues of the main body (Cunningham et al., 2013) (Fig. 4A). Additional work is required to resolve these findings, but they suggest that complex and redundant mechanisms control *Tbx5* expression.

As with the specification of antero-posterior polarity, hindlimb initiation involves a distinct developmental programme that is controlled by regionally restricted transcription factors (*Pitx1* and *Isl1*), which co-operatively regulate *Tbx4* expression in the LPM of the mouse (Duboc and Logan, 2011; Kawakami et al., 2011) (Fig. 4B). *Isl1* acts downstream of *Gdf11* signalling (Jurberg et al., 2013), and also activates the Wnt signalling pathway, which is essential for hindlimb development (Kawakami et al., 2011) (Fig. 4B). Evidence that Hox proteins regulate *Pitx1* expression comes from capture Hi-C (chromatin conformation capture that determines the number of interactions between genomic loci in defined 3D space) approaches in the mouse, which show that *Hoxc9-Hoxc11* interact with a *Pitx1* enhancer (*Pen*) (Kragesteen et al., 2018) (Fig. 4B). Although RA has been proposed to act as a co-factor with *Tbx4* to initiate *Fgf10* expression and hindlimb outgrowth in the chick (Nishimoto et al., 2015), the genetic or pharmacological removal of RA signalling in mouse and chick embryos, respectively, prevents the initiation of the forelimb, but not the hindlimb bud (Niederreither et al., 2002; Stratford et al., 1996). Therefore, although we are gaining detailed information of how limb bud initiation is controlled at the molecular level, there are still gaps in our understanding about the underlying differences between forelimbs and hindlimbs.

### Limb pattern specification

#### Proximo-distal specification

How is the pattern of tissues specified along the proximo-distal axis of the limb? The ‘progress zone model’ was influenced by Saunders’ apical ectodermal ridge removal experiments, which

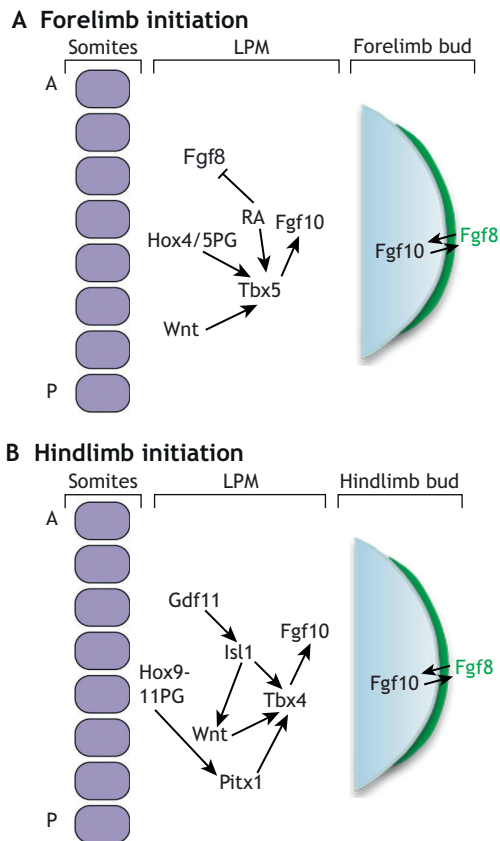

**Fig. 4. Limb initiation.** (A) Major regulatory interactions involved in forelimb initiation. *Tbx5* in forelimb level lateral plate mesoderm (LPM) is required for Fgf10-dependent forelimb initiation. *Hox4* and *Hox5* paralogous group (PG) proteins, Wnt/ $\beta$ -catenin signalling and retinoic acid (RA) are implicated in the regulation of *Tbx5* in the LPM. Retinoic acid also indirectly promotes *Tbx5* expression through repression of *Fgf8* in axial tissues. (B) Major regulatory interactions involved in hindlimb initiation. *Tbx4* in hindlimb level LPM is required for Fgf10-dependent hindlimb initiation. *Tbx4* expression is regulated by Wnt signalling and the regionally restricted transcription factors *Pitx1* and *Isl1*, which are downstream targets of *Hox9-Hox11* PG proteins and *Gdf11*, respectively. A, anterior; P, posterior.

truncated the chick wing at progressively more proximal to distal levels the later they were performed (Saunders, 1948). The model posits that mesoderm cells receive proximo-distal positional information depending on how long they remain in the progress zone (a region of distal mesoderm extending about 200-300  $\mu$ m from the tip of the limb) and therefore in proximity of signalling by the apical ectodermal ridge (Summerbell et al., 1973): the first cells to be displaced away from the progress zone would become the proximal humerus, and cells displaced later would become progressively more-distal structures. In this model, mesoderm cells in the progress zone change their positional values by intrinsically measuring time, and apical ectodermal ridge signalling provides a permissive role (i.e. signals maintain outgrowth but do not instructively specify pattern). The proximal to distal order of positional value specification is supported by the temporal pattern of 5' *Hoxa* and *Hoxd* gene expression, starting with *Hox9* and *Hox10* (upper arm), *Hox11* (forearm), and *Hox12* and *Hox13* (wrist/hand-plate) (reviewed by Zakany and Duboule, 2007). The sequential expression of Hox genes involves complex cross-regulatory interactions (reviewed by Zakany and Duboule, 2007) (Box 1).

A later model proposes that proximal and distal signalling gradients co-operatively specify proximo-distal positional values. This 'two-signal model' is based on the observation that Fgfs from the apical ectodermal ridge antagonise RA signalling (using *Meis1* and *Meis2* in the proximal part of the limb bud as a read-out of RA signalling) from the flank of the embryo (Mercader et al., 1999, 2000). Further studies in the chick have confirmed RA as a signal capable of specifying proximal fate (Cooper et al., 2011; Rosello-Diez et al., 2011). Retinoic acid is also likely to coordinate the outgrowth of the limb with proximo-distal patterning, because it needs to be cleared from the early chick wing bud by a combination of active degradation and displacement by growth to allow the programme of 5' *Hoxa/d11-13* gene expression to be activated (Rosello-Diez et al., 2014). Recent evidence from the mouse obtained by the conditional inactivation of *Meis1* and *Meis2* has been presented in support of the two-signal model (Delgado et al., 2020). The absence of *Meis* function results in the loss or severe reduction of proximal structures in both forelimbs and hindlimbs, which have normal digit development. The authors explain these results in terms of an instructive model in which the Fgf to RA ratio is interpreted into a gradient of *Meis1* and *Meis2* abundance that specifies proximo-distal positional values: high *Meis1* and *Meis2* would specify proximal positional values, low *Meis1* and *Meis2*, intermediate positional values and absent *Meis1* and *Meis2*, distal positional values (Fig. 5) (Delgado et al., 2020). The diminishing levels of RA, *Meis1* and *Meis2* would allow the progressive activation of *Hoxa11* to *Hoxa13*. Therefore, proximal structures are lost in *Meis1* and *Meis2* mutants because of the precocious activation of the 5'-most Hox genes. However, *Hoxa11* and then *Hoxa13* are still progressively activated in the absence of *Meis* function (Delgado et al., 2020), which suggests that a timing mechanism underlies this transition (Fig. 5). Indeed, in the chick wing, manipulations of RA and Fgf signalling fail to advance the timing of *Hoxa13* expression (Vargesson et al., 2001; Rosello-Diez et al., 2014) (Fig. 5).

Recent experiments in the chick support a 'signal-time model' in which signals specify proximal limb segments, as discussed (i.e. humerus), and then intrinsic timing specifies distal segments (i.e. wrist/digits) (Saiz-Lopez et al., 2015) (Fig. 5). When distal mesoderm from an early chick wing bud (*Hoxa11* positive/*Hoxa13* negative) was grafted beneath the apical ectodermal ridge of a host wing bud that was 24 h older (*Hoxa13* positive), the grafted cells maintained their intrinsic timing of cell proliferation and *Hoxa13* and *Hoxd13* expression, which marks the specification of distal positional values (Saiz-Lopez et al., 2015). Therefore, it appears that signals control the transition from proximal to intermediate specification (*Hoxa10* and *Hoxd10* to *Hoxa11* and *Hoxd11*) and that timing controls the transition from intermediate to distal specification (*Hoxa11* and *Hoxd11* to *Hoxa13* and *Hoxd13*) (Fig. 5). It remains unclear when this switch occurs, and one possibility is that a low level of RA signalling, *Meis1* and *Meis2* activity is required for the autonomous timer to start once *Hoxa11* has been activated (Fig. 5).

#### Dorso-ventral specification

How the pattern of tissues along the dorso-ventral axis of the limb bud is specified has not been investigated in as much detail as the other axes. Tissue rotation experiments in the chick have shown that ectodermal signals specify the dorso-ventral polarity of the underlying mesoderm within the first 24 h of limb outgrowth (MacCabe et al., 1974; Akita, 1996). Further work has identified Wnt7a as a dorsal signal (Parr and McMahon, 1995) and *Bmps* as

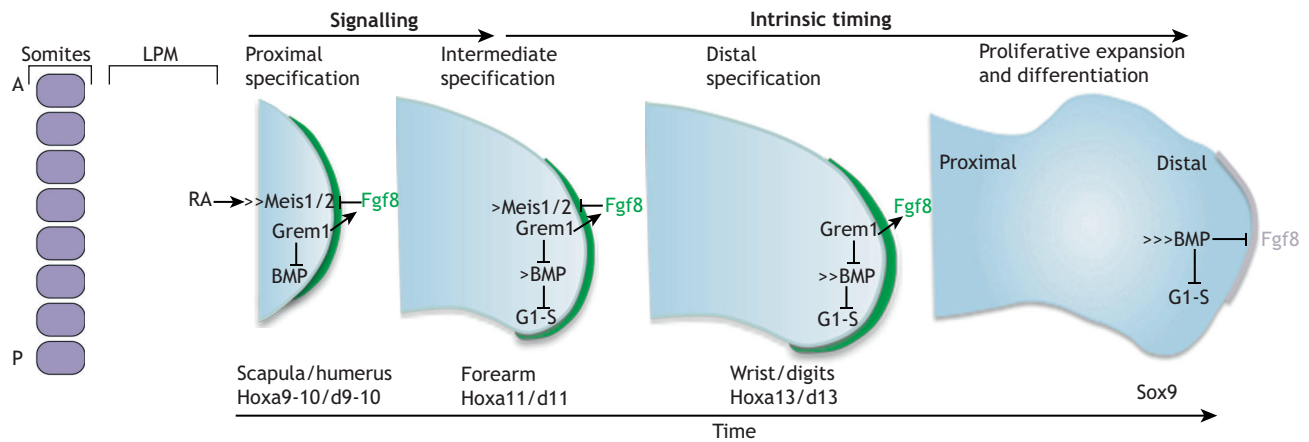

**Fig. 5. Proximo-distal patterning.** Signal-time model of proximo-distal patterning. Opposing retinoic acid (RA) and Fgf signals are translated into a gradient of Meis1 and Meis2 protein (Meis1/2). High levels ( $>>$ Meis1/2) to low levels ( $>$ Meis1/2) are required for the timely transition from proximal positional value specification (humerus Hoxa10 and Hoxd10) to intermediate positional value specification (forearm Hoxa11 and Hoxd11). Clearance of RA following the onset of *Hoxa11* expression then triggers an intrinsic timing mechanism required for the transition from intermediate positional value specification (forearm Hoxa11 and Hoxd11) to distal positional value specification (wrist digits Hoxa13 and Hoxd13). *Grem1* inhibits Bmp signalling to maintain the apical ectodermal ridge (Fgf8, green). The intrinsic increase over time from low Bmp signalling ( $>$ BMP) to high Bmp signalling ( $>>>$ BMP) overcomes *Grem1* inhibition to suppress G1-to S-phase entry (G1-S) and to terminate proliferative growth once the skeletal elements are laid down (Sox9). Bmp signalling causes regression of the apical ectodermal ridge. A, anterior; LPM, lateral plate mesoderm; P, posterior.

ventral signals (Pizette et al., 2001). Accordingly, limbs of mice lacking *Wnt7a* function are ventralised (Parr and McMahon, 1995); those lacking the *Bmp* target gene *engrailed 1* are dorsalised (Loomis et al., 1996), and the overexpression of the *Wnt7a* target gene *Lmx1b* dorsalises the chick limb (Riddle et al., 1995; Vogel et al., 1995). Akita has proposed a model in which high concentrations of a dorsal signal would specify dorsal tissues and low concentrations would specify ventral tissues (Akita, 1996). However, it is unclear how far ectodermal signals spread into the underlying mesoderm and whether they act through secondary signals. One observation is that, although the early limb consists of multipotent mesoderm cells that have the capacity to populate any of the segments along the proximo-distal axis, they are lineage restricted into dorsal and ventral compartments (Pearse et al., 2007; Arques et al., 2007). Therefore, cells in these compartments could respond differently to signals from other organisers, such as the polarising region or apical ectodermal ridge, and this could be a way by which limb anatomy could be refined. Furthermore, *Wnt7a* signalling, which emanates from the dorsal ectoderm of the limb, regulates *Shh* expression, thus showing how dorso-ventral and antero-posterior patterning are integrated (Parr and McMahon, 1995).

#### Antero-posterior specification

Several types of tissue-grafting experiments performed in the chick embryo have resulted in a positional information model of antero-posterior specification, based on graded signalling by the polarising region (reviewed by Tickle and Towers, 2017). The polarising region was discovered in experiments in which grafts of posterior chick wing mesoderm were made to the anterior margin of the wing bud of a host embryo. This resulted in the normal digit pattern (1, 2 and 3) being symmetrically duplicated (i.e. 3, 2, 1, 1, 2 and 3) (Saunders and Gasseling, 1968). Lewis Wolpert interpreted the results of these experiments in terms of positional information, with the polarising region producing a signal, which specifies positional values that encode the different digit identities in a concentration-dependent manner (Tickle et al., 1975; reviewed by Vargesson, 2020) (Fig. 6A). As we have discussed, transcripts of *Shh* are restricted to the polarising region (Riddle et al., 1993), and its

encoded protein fulfils the criteria required for a polarising region signal to specify antero-posterior positional values (reviewed by Tickle and Towers, 2017). However, here we consider recent evidence from both chick and mouse systems, which indicate that *Shh* might specify digit identity via secondary signals.

Digits do not form in the absence of *Shh* function in both knockout mice and naturally occurring chicken mutants (*oligozeugodactyly*), apart from a single dysmorphic digit 1 in their hindlimbs (Chiang et al., 2001; Ros et al., 2003). Timed experiments, in which *Shh* signalling has been either pharmacologically blocked in the chick wing (Towers et al., 2008, 2011) or genetically removed in the mouse limb (Zhu et al., 2008, 2020 preprint), both show that digit identities are specified during early stages of limb outgrowth (Fig. 6A,B). Lineage-tracing experiments have revealed that chick wing bud cells are sequentially 'promoted' through anterior to posterior positional values every 4 h by progressively higher concentrations of *Shh* signalling (Yang et al., 1997; Towers et al., 2011). Thus, by 4 h, *Shh* signalling specifies 'digit 1' positional values, by 8 h 'digit 2' positional values and by 12 h 'digit 3' positional values.

Evidence that *Shh* may not operate as a graded morphogen in the specification of antero-posterior positional values has been obtained by genetic lineage-tracing experiments in mouse forelimbs and hindlimbs, revealing that the two most-posterior digits (4 and 5 out of digits 1-5) are derived from the polarising region itself (Fig. 6B) (Harfe et al., 2004). Unexpectedly, the specification of these digit identities is independent of the concentration of *Shh* signalling, but is instead considered to depend on the length of time that cells are directly exposed to short-range *Shh* signalling (Harfe et al., 2004). GFP-expressing tissue transplantation experiments in the chick wing have shown that the polarising region does not contribute to the digit skeleton (Towers et al., 2011), consistent with a concentration gradient mechanism of long-range signalling for specifying the positional values that encode digit 1, 2 and 3 identities (Fig. 6A). In the chick leg, positional values that encode digit 1, 2 and 3 identities are specified by *Shh* signalling in the same manner as the equivalent digits of the wing (Towers et al., 2011). However, the chick leg has a fourth digit that arises from the cells of

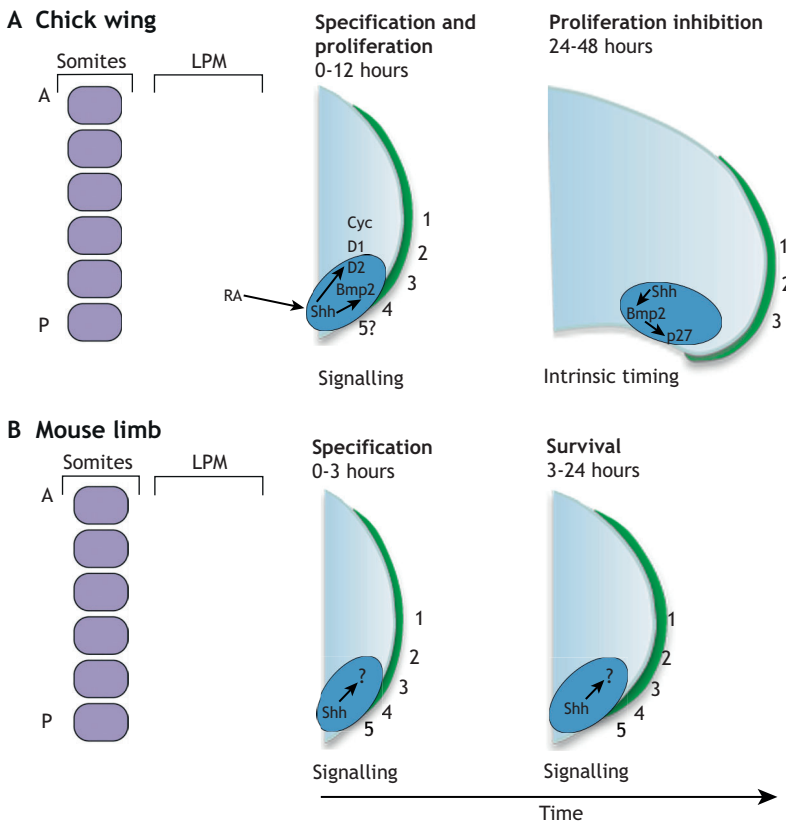

**Fig. 6. Models of antero-posterior patterning.** (A) Chick wing. Retinoic acid (RA) is involved in stimulating *Shh* transcription and the formation of the polarising region (blue). Long-range *Shh* signalling promotes proliferative growth (cyclin D1) and, by acting directly and/or via secondary *Bmp* signals, promotes the anterior-to-posterior specification of positional values encoding digits 1, 2 and 3. The clearance of RA starts an autoregulatory intrinsic timing mechanism in the polarising region that determines the duration of *Shh* expression and proliferation: short-range *Shh* signalling intrinsically controls proliferative growth of the polarising region (via cyclin D2) and then inhibits growth (via *Bmp2* and *p27*) to prevent posterior digit formation (digit 4 and possibly digit 5). (B) Mouse limb. Short-range *Shh* signalling, acting via unknown secondary relay signals, specifies digits 1-5. Digits 4 and 5 are derived from the polarising region. *Shh* signalling then acts as a long-range signal to suppress apoptosis and allow the survival and growth of digit 1-5 progenitor cells. The specification of digit 1 requires *Shh* signalling in the forelimb (shown), but is considered to be independent of *Shh* signalling in the hindlimb (Chiang et al., 2001). A, anterior; LPM, lateral plate mesoderm; P, posterior.

the polarising region, which are sequentially promoted through anterior to posterior positional values (digits 1 to 4), possibly by the duration of short-range *Shh* signalling (Towers et al., 2011).

*Shh* signalling could specify antero-posterior positional values via secondary signals, including *Bmp2*, which is a downstream target (Drossopoulou et al., 2000) (Fig. 6A). Thus, the manipulation of *Bmp* signalling (application of recombinant *Bmp2* protein or *Nog*-expressing cells), following the transient application of a *Shh*-soaked bead at the anterior margin of the chick wing bud, is capable of changing digit identity in the duplicated patterns (Drossopoulou et al., 2000). Furthermore, the pharmacological inhibition of *Shh* signalling in the chick wing causes digit 2 to become the most-posterior digit of the pattern, but the application of recombinant *Bmp2* protein transforms this digit to a posterior digit 3 (Pickering et al., 2019). However, it is unclear whether promotion of antero-posterior positional values involves the duration/concentration of *Shh* signalling being interpreted into graded *Bmp2* signalling. Another possibility is that promotion could involve the activation of different *Bmp* homo/heterodimer combinations.

In the mouse limb, the use of a *Gli1* reporter transgene showed that only polarising region cells directly receive *Shh* signalling during the 2-3 h it is required for specification (Zhu et al., 2020 preprint). Therefore, it is suggested that digits 1 to 3 (and possibly 4 and 5) are specified by secondary relay signals emanating from the polarising region (Zhu et al., 2008, 2020 preprint) (Fig. 6B). It is unclear whether *Bmps* are involved in the specification of antero-posterior positional values in the mouse limb, because the genetic removal of *Bmp2*, *Bmp4* and *Bmp7* function does not appear to cause overt transformations of digit identity (Bandyopadhyay et al., 2006). However, it has been noted that digits 2 to 5 of the mouse limb have very similar anatomies in terms of phalange number and proportion (Delgado and Torres, 2016). This observation could

suggest that they developed from cells that were specified with ‘anterior’ positional values at a very early stage (Tickle and Towers, 2017; Towers, 2018). Distinct anatomical identities could arise from the subtle interpretation of these positional values, which could then be elaborated by differential growth of the limb bud at later stages (see the section ‘Digit number determination’). By contrast, the further promotion of positional values that encode definitive posterior digit identities in chick limbs could involve *Bmps*, and therefore explain the longer period of anterior to posterior positional value specification compared with the mouse (Fig. 6A,B).

In summary, the emerging view is the *Shh* signalling may not act directly to specify digit identities in chick and mouse limbs. Further work is required to understand how this is achieved, but, at least for the chick, *Bmps* are likely to function as secondary signals in the specification of antero-posterior positional values.

### Limb growth

In order to understand many of the processes discussed so far, we need to consider the important contribution of growth. Early studies determined that proliferation is maintained in prospective chick wing cells and reduced in the adjacent interlimb flank (Searls and Janners, 1971). However, it is unclear whether this alone can explain how the limb bud forms. Evidence from the chick has indicated that *Tbx5* is involved in an epithelial-to-mesenchymal transition, in which cells from the coelomic lining of the somatopleure are recruited into the forelimb-forming field (Gros and Tabin, 2014). This influx of cells could supplement those derived from the LPM and influence localised budding from the body wall. Indeed, early work has shown that presumptive chick wing bud mesoderm is less cohesive than interlimb mesoderm (Heintzelman et al., 1978), and this could facilitate outgrowth from the flank of the embryo.



Contemporary live-imaging analyses of early mouse and chick limb buds has revealed that cells align themselves in the direction of outgrowth, while cells in more dorsal and ventral positions become oriented towards the overlying limb ectoderm (Gros et al., 2010; Wyngaarden et al., 2010). In addition, *Wnt5a* and *Fgf* signalling are required for limb elongation along the proximo-distal axis. An instructive gradient of *Wnt5a* is implicated in establishing planar cell polarity in the limb by promoting directional cell migration and/or directional cell division, while *Fgf4* and *Fgf8* signalling from the apical ectodermal ridge orients this process to promote a distal growth trajectory (Gao et al., 2018). However, the contribution that active cell migration and/or cell division play in directional outgrowth remains unclear. These findings help to explain earlier experiments in the chick wing bud, in which dye-labelled cells radiated towards an ectopic source of *Fgf* protein (Li and Muneoka, 1999). Computational modelling approaches in the mouse limb also predict the crucial requirement for directional cell division in shaping the outgrowing limb bud (Boehm et al., 2010). The cell rearrangements occurring during early limb bud development could reflect convergence/extension movements similar to those that elongate the main body axis (Bénazéraf et al., 2010).

Continued limb outgrowth depends on the action of the *Bmp* inhibitor *gremlin 1* (*Grem1*), which is expressed in the mesoderm and maintains the apical ectodermal ridge (Zuniga et al., 1999) (Fig. 5). In the mouse, *Grem1* expression is induced by *Bmp4* and *Shh* signalling in the early bud (Benazet et al., 2009), and recent work in the chick (Pickering and Towers, 2016) and the mouse (Zhu et al., 2020 preprint) has shown that *Grem1* expression becomes independent of *Shh* signalling following the early period of digit identity specification. In addition, grafts of distal mesoderm made between young and old chick wing buds have shown that the decline in the rate at which proliferation terminates proximo-distal outgrowth during the patterning phase is intrinsically controlled (Saiz-Lopez et al., 2015, 2017), and is associated with a progressive increase in *Bmp* signalling that overcomes *Grem1* inhibition (Pickering et al., 2018) (Fig. 5). These results corroborate well with the signal-time model for proximo-distal specification, which predicts that the distalisation of the limb bud mesoderm becomes an autonomous process (Fig. 5).

### Digit number determination

As well as being involved in specifying positional values that encode digit identities, *Shh* signalling directly stimulates the antero-posterior expansion of the chick wing bud via the regulation of factors that stimulate G1- to S-phase entry, including cyclin D1 (*Ccnd1*) (Towers et al., 2008) (Fig. 6A). This process provides a large enough area of posterior-distal mesoderm to allow the positional values for three digit identities to be specified. In the mouse hindlimb, the early removal of *Shh* signalling following the 2-3 h period during which it is required for digit identity specification results in apoptosis of distal mesoderm cells and the failure to form digits (Zhu et al., 2020 preprint). The use of the *Gli1* reporter transgene suggests that *Shh* acts as a long-range signal during this time, and the suppression of apoptosis via the removal of the *Bax* and *Bak* genes rescued the formation of 3-5 digits (Zhu et al., 2020 preprint) (Fig. 6B). These observations suggest differences from chick limbs, because the complete loss of *Shh* signalling in *oligozeugodactyly* mutants does not result in apoptosis in the posterior of the limb where the digit progenitors are located (Ros et al., 2003) (Fig. 6B). In addition, as it does not appear that *Shh* signalling is required for proliferation in the mouse limb (Zhu et al., 2020 preprint), it suggests there is a specific role for this

process in the promotion of antero-posterior positional values in chick limbs (Fig. 6A) (Towers et al., 2008).

Another role for *Shh* signalling in the control of proliferation has been uncovered in the chick wing. Grafting experiments showed that the duration of *Shh* expression and proliferation in the chick wing polarising region are controlled by an autoregulatory intrinsic timing mechanism, which is triggered by the depletion of RA signalling from the trunk of the embryo (Chinnaiya et al., 2014; Pickering et al., 2019) (Fig. 6A). Thus, during digit identity specification stages in the chick wing, *Shh* signalling stimulates G1- to S-phase entry via cyclin D2 (*Ccnd2*) and this could adjust the number of *Shh*-expressing polarising region cells. However, following digit identity specification, *Shh* signalling inhibits G1- to S-phase entry via the *Bmp2*-mediated regulation of the D cyclin-dependent kinase inhibitor *p27<sup>kip1</sup>*, which prevents the polarising region from producing at least one additional posterior digit (Pickering et al., 2019) (Fig. 6A). The fate of most chick wing polarising region cells is to undergo apoptosis, which is also controlled by *Shh* signalling (Sanz-Ezquerro and Tickle, 2000), thus further showing how morphogenetic processes are tightly regulated in the posterior part of the chick wing to restrict digit number.

It had been initially suggested that polarising region signalling, as well as specifying antero-posterior positional values that encode digit identity, could also determine digit number (Wolpert, 1969). However, 'recombinant limb' experiments, in which chick limb bud mesoderm cells are disaggregated and reaggregated, before being transferred into an epithelial jacket and grafted to a host embryo, have shown the astonishing ability of cells to self-organise into a rudimentary pattern of digits (Zwilling, 1964; Pautou, 1973). The grafting of a polarising region into a recombinant limb gives the digits their distinctive morphological characteristics (Elisa Piedra et al., 2000), thus showing that the processes of digit specification (positional information) and digit number determination (self-organisation) are separable. In addition, many mouse mutants with de-repressed *Shh* signalling, such as the *Shh/Gli3* double mutant, produce multiple digits of very similar anatomy (Litngtung et al., 2002; te Welscher et al., 2002b). These findings are consistent with digit number being determined by the width of the hand-plate, which provides boundary conditions for a 'Turing-type' self-organising system based on reaction-diffusion (Wilby and Ede, 1975; Newman and Frisch, 1979). From experimental evidence in the mouse, a model has been formulated that integrates the known roles of *Bmp* ligands as activators of digit formation and *Wnt* ligands as inhibitors, to converge on an early chondrogenic marker, *Sox9*, thereby producing a repeated pattern of digits and interdigits (Raspopovic et al., 2014). *5' Hoxa* and *Hoxd* proteins are implicated in the control of digit spacing, and hence digit number, by determining the wavelength of reaction-diffusion of *Wnt* and *Bmp* ligands (Sheth et al., 2012). However, it is unclear how this is achieved. Digit formation has also been modelled on the ability of mesoderm cells to sort themselves using their differential surface adhesion properties (Oster et al., 1983), which can occur in the absence of *Sox9 in vitro* (Barna and Niswander, 2007). Indeed, studies in the chick have implicated galectin proteins, which bind cell-surface carbohydrates, in facilitating self-organisation by adhesion (Bhat et al., 2011). Therefore, the interplay between reaction-diffusion and cell adhesion in digit number determination needs to be resolved.

*Shh* signalling controls *5' Hoxd* gene expression (Capellini et al., 2006; Lettice et al., 2017), and this could provide a mechanism that integrates digit identity specification and digit number

determination. Indeed, the pharmacological inhibition of Shh signalling in the chick wing at a specific temporal window during anterior to posterior positional value promotion can uncouple these two processes, and produce up to three morphologically similar digits [similar to digit 2 in terms of phalange number and proportion (Pickering and Towers, 2016)]. Recent research has provided a further mechanism for how Shh signalling and 5' Hox genes control digit number in the mouse limb. Digit 1 (thumb) development requires *Hoxa13* to maintain *Hoxd13* expression via inhibition of Gli3 (Bastida et al., 2020). This means that, in *Hoxa13* mutant limbs, Gli3 represses *Hoxd13* and this prevents thumb formation, emphasising once again the cross-repressive nature of Hox gene regulation (Bastida et al., 2020).

### Interpretation of gene expression into limb anatomy

A major gap in our understanding of limb development is how gene expression is translated into anatomy. The best candidates we have are *Pitx1* as a hindlimb determinant and *Lmx1b* as a dorsal determinant: the mis-expression of *Pitx1* in the mouse forelimb results in the acquisition of morphologies that are characteristic of the hindlimb (Minguillon et al., 2005); and, as mentioned previously, the constitutive overexpression of *Lmx1b* dorsalises the chick limb (Riddle et al., 1995; Vogel et al., 1995). So how do these transcription factors determine anatomy?

Nemec and colleagues have used RNA-seq and ChIP-seq to identify *Pitx1* targets in the mouse limb (Nemec et al., 2017). As appreciated in previous work, very few genes are expressed exclusively in forelimb or hindlimb buds (Cotney et al., 2012). Surprisingly, however, *Pitx1* modulates the expression of genes that are active during both forelimb and hindlimb development, in particular, factors involved in chondrogenesis, including *Sox9* (Nemec et al., 2017). In the search for additional candidates, a further study in the mouse has shown that *Tbx4* interacts directly with the hindlimb-restricted *Hoxc10* protein, and ChIP-seq analyses revealed that this complex activates many of the same genes as *Tbx5* (Jain et al., 2018). Although this is unsurprising, it highlights the major challenge of understanding how the same genes could be involved in determining subtle anatomical variation.

Haro and colleagues have used a similar strategy involving ChIP-seq analysis to find *Lmx1b* targets in E12.5 mouse limb buds (Haro et al., 2017). Direct transcriptional targets include genes involved in various processes, most notably, in terms of tissue architecture: the extracellular matrix and bone development. Interestingly, one direct target of *Lmx1b* is the TGF $\beta$  family member, *Gdf5* (growth differentiation factor 5), which is involved in joint formation, thus providing a link between gene expression and anatomy (Haro et al., 2017).

For proximo-distal patterning, Meis and 5' Hox proteins remain the best candidates for determining the anatomy of the main subdivisions of the limb. However, there is no evidence that the manipulation of these genes can cause the transformation of positional identity. Verified targets of 5' Hox proteins include genes involved in cell adhesion, such as those encoding ephrin receptors (Stadler et al., 2001; Salsi and Zappavigna, 2006), cadherins (Salsi et al., 2008) and genes involved in chondrogenesis, such as *Bmp2* and *Bmp7* (Knosp et al., 2004). Targets involved in cell adhesion are of particular interest because the stable memory of positional information is considered to reside in differential cell surface properties (Ide et al., 1994; Nardi and Stocum, 1984; Wada and Ide, 1994).

For translating antero-posterior positional information into digit identity, most studies have used genomic approaches in chick and

mouse limbs to characterise the downstream response to Shh signalling, and have uncovered many of the same targets, such as *Bmp2*, *Hoxd13*, *Tbx2*, *Tbx3* and *Grem1* (Vokes et al., 2008; Bangs et al., 2010). Lewandowski and colleagues have undertaken detailed ChIP-seq and RNA-seq analyses of the posterior region of *Shh/Gli3* mouse mutants (Lewandowski et al., 2015). However, several digits of similar anatomy form in the limbs of these mutants because of the de-repression of Shh signalling (Litington et al., 2002; te Welscher et al., 2002a), so it is unclear if they have distinct identities. Nonetheless, the results showed that Shh signalling controls gene expression, primarily by relieving repression by its main transcriptional effector, Gli3. In addition, three regional patterns of gene expression have been described in the limb bud (Lewandowski et al., 2015). In terms of the specification of digit identity, the most interesting region expresses the *Hoxd13*, *Sall1* and *Sall3* genes, which have previously been implicated in this process (reviewed by Tickle and Towers, 2017). So far, only the overexpression of *Tbx2* and *Tbx3* has been reported to change digit identity in the chick leg, albeit with low penetrance (Suzuki et al., 2004).

The evidence that Bmp signalling could act downstream of Shh signalling at early limb bud stages could make it worthwhile to determine if its downstream targets are involved in the specification of digit identity. This idea is lent support because the manipulation of Bmp signalling in the so-called phalanx-forming region (Suzuki et al., 2008) during chondrogenic stages can transform digit identity in the chick leg (Dahn and Fallon, 2000). Therefore, it is possible that Bmp signalling primes the activity of genes at early stages, which are expressed later in response to a second wave of Bmp signalling. In addition, Bmp signalling inhibits Fgf signalling by the apical ectodermal ridge – the duration of which determines the number of phalanges with a periodicity characteristic for each digit (Sanz-Ezquerro and Tickle, 2003). Taken together, a common theme emerges in which the interpretation of positional information depends on the subtle regulation of the same genes involved in processes such as connective tissue/cartilage development.

### Conclusions

We have presented a current view of how the vertebrate limb is patterned. This knowledge is crucial to our understanding of how a myriad of genetic disorders affect human limb development, and to the ultimate goal of designing regenerative therapies to enable the replacement of missing limb structures (Cox et al., 2019). However, many challenges remain and we will outline three. First, although we have discussed signalling molecules, the dynamics underlying gradient formation and their range of action remain unclear, which is complicated by the fact that they can be transported by different mechanisms, such as diffusion, or by filopodia in the case of Shh (Sanders et al., 2013). Second, it is apparent that, apart from at the earliest stages, chick limb bud mesoderm cells develop according to intrinsic timing mechanisms that are associated with growth, the nature of which need to be deciphered. A third major issue is that, despite some recent advances, we still have little knowledge about how early positional information is 'remembered' epigenetically and interpreted into gene expression, which determines anatomy. This is hindered by the fact that limb development largely involves the patterning of the same tissue types, rather than the patterning of distinct cell types, which have defined gene regulatory networks. It is becoming evident that differences in anatomy arise due to the fine-tuning in the expression of the same genes, and this will require sensitive techniques to quantify precise changes, which could determine, for example, humerus versus femur anatomy.

Furthermore, it is likely that such experimental data will need to be integrated with biophysical, computational and mathematical approaches to help understand how fine-scale anatomy is achieved. Finally, it is encouraging that, although this Review has largely concentrated on mouse and chick studies, attempts are being made to understand human limb development (Cotney et al., 2013), which is the ultimate goal of the field.

#### Acknowledgements

We thank Cheryl Tickle for critical reading, and Marian Ros for critical reading and for providing limb bud schematics.

#### Competing interests

The authors declare no competing or financial interests.

#### Funding

The authors' research is funded by the Wellcome Trust (202756/Z/16/Z).

#### References

- Agarwal, P., Wylie, J. N., Galceran, J., Arkhitko, O., Li, C. L., Deng, C. X., Grosschedl, R. and Bruneau, B. G. (2003). Tbx5 is essential for forelimb bud initiation following patterning of the limb field in the mouse embryo. *Development* **130**, 623-633. doi:10.1242/dev.00191
- Aires, R., Jurberg, A. D., Leal, F., Nóvoa, A., Cohn, M. J. and Mallo, M. (2016). Oct4 is a key regulator of vertebrate trunk length diversity. *Dev. Cell* **38**, 262-274. doi:10.1016/j.devcel.2016.06.021
- Akita, K. (1996). The effect of the ectoderm on the dorsoventral pattern of epidermis, muscles and joints in the developing chick leg: a new model. *Anat. Embryol.* **193**, 377-386. doi:10.1007/BF00186694
- Akiyama, R., Kawakami, H., Wong, J., Oishi, I., Nishinakamura, R. and Kawakami, Y. (2015). Sall4-Gli3 system in early limb progenitors is essential for the development of limb skeletal elements. *Proc. Natl. Acad. Sci. USA* **112**, 5075-5080. doi:10.1073/pnas.1421949112
- Altshuler, M., Clarke, J. D. and Tickle, C. (1997). Dorso-ventral ectodermal compartments and origin of apical ectodermal ridge in developing chick limb. *Development* **124**, 4547-4556.
- Andrey, G., Montavon, T., Mascrez, B., Gonzalez, F., Noordermeer, D., Leleu, M., Trono, D., Spitz, F. and Duboule, D. (2013). A switch between topological domains underlies HoxD genes collinearity in mouse limbs. *Science* **340**, 1195. doi:10.1126/science.1234167
- Arques, C. G., Doohan, R., Sharpe, J. and Torres, M. (2007). Cell tracing reveals a dorsoventral lineage restriction plane in the mouse limb bud mesenchyme. *Development* **134**, 3713-3722. doi:10.1242/dev.02873
- Bandyopadhyay, A., Tsuji, K., Cox, K., Harfe, B. D., Rosen, V. and Tabin, C. J. (2006). Genetic analysis of the roles of BMP2, BMP4, and BMP7 in limb patterning and skeletogenesis. *PLoS Genet.* **2**, e216. doi:10.1371/journal.pgen.0020216
- Bangs, F., Welten, M., Davey, M. G., Fisher, M., Yin, Y., Downie, H., Paton, B., Baldock, R., Burt, D. W. and Tickle, C. (2010). Identification of genes downstream of the Shh signalling in the developing chick wing and syn-expressed with Hoxd13 using microarray and 3D computational analysis. *Mech. Dev.* **127**, 428-441. doi:10.1016/j.mod.2010.08.001
- Barna, M. and Niswander, L. (2007). Visualization of cartilage formation: insight into cellular properties of skeletal progenitors and chondrodysplasia syndromes. *Dev. Cell* **12**, 931-941. doi:10.1016/j.devcel.2007.04.016
- Barrow, J. R., Thomas, K. R., Boussadia-Zahui, O., Moore, R., Kemler, R., Capecchi, M. R. and McMahon, A. P. (2003). Ectodermal Wnt3/beta-catenin signaling is required for the establishment and maintenance of the apical ectodermal ridge. *Genes Dev.* **17**, 394-409. doi:10.1101/gad.1044903
- Bastida, M. F., Pérez-Gómez, R., Trofka, A., Zhu, J., Rada-Iglesias, A., Sheth, R., Stadler, H. S., Mackem, S. and Ros, M. A. (2020). The formation of the thumb requires direct modulation of Gli3 transcription by Hoxa13. *Proc. Natl. Acad. Sci. USA* **117**, 1090-1096. doi:10.1073/pnas.1919470117
- Beccari, L., Yakushiji-Kaminatsui, N., Woltering, J. M., Necseulea, A., Lonfat, N., Rodriguez-Carballo, E., Mascrez, B., Yamamoto, S., Kuroiwa, A. and Duboule, D. (2016). A role for HOX13 proteins in the regulatory switch between TADs at the HoxD locus. *Gene Dev.* **30**, 1172-1186. doi:10.1101/gad.281055.116
- Bénazéraf, B., Francois, P., Baker, R. E., Denans, N., Little, C. D. and Pourquié, O. (2010). A random cell motility gradient downstream of FGF controls elongation of an amniote embryo. *Nature* **466**, 248-252. doi:10.1038/nature09151
- Benazet, J.-D., Bischofberger, M., Tiecke, E., Goncalves, A., Martin, J. F., Zuniga, A., Naef, F. and Zeller, R. (2009). A self-regulatory system of interlinked signaling feedback loops controls mouse limb patterning. *Science* **323**, 1050-1053. doi:10.1126/science.1168755
- Bhat, R., Lerea, K. M., Peng, H., Kaltner, H., Gabius, H.-J. and Newman, S. A. (2011). A regulatory network of two galectins mediates the earliest steps of avian limb skeletal morphogenesis. *BMC Dev. Biol.* **11**, 6. doi:10.1186/1471-213X-11-6
- Boehm, B., Westerberg, H., Lesnicar-Pucko, G., Raja, S., Rautschka, M., Cotterell, J., Swoger, J. and Sharpe, J. (2010). The role of spatially controlled cell proliferation in limb bud morphogenesis. *PLoS Biol.* **8**, e1000420. doi:10.1371/journal.pbio.1000420
- Capellini, T. D., Di Giacomo, G., Salsi, V., Brendolan, A., Ferretti, E., Srivastava, D., Zappavigna, V. and Selleri, L. (2006). Pbx1/Pbx2 requirement for distal limb patterning is mediated by the hierarchical control of Hox gene spatial distribution and Shh expression. *Development* **133**, 2263-2273. doi:10.1242/dev.02395
- Chaube, S. (1959). On axiation and symmetry in transplanted wing of the chick. *J. Exp. Zool.* **140**, 29-77. doi:10.1002/jez.1401400104
- Chiang, C., Litingtung, Y., Harris, M. P., Simandl, B. K., Li, Y., Beachy, P. A. and Fallon, J. F. (2001). Manifestation of the limb prepattern: limb development in the absence of Sonic hedgehog function. *Dev. Biol.* **236**, 421-435. doi:10.1006/dbio.2001.0346
- Chinnaiya, K., Tickle, C. and Towers, M. (2014). Sonic hedgehog-expressing cells in the developing limb measure time by an intrinsic cell cycle clock. *Nat. Commun.* **5**, 4230. doi:10.1038/ncomms5230
- Cohn, M. J., Izpisua-Belmonte, J. C., Abud, H., Heath, J. K. and Tickle, C. (1995). Fibroblast growth factors induce additional limb development from the flank of chick embryos. *Cell* **80**, 739-746. doi:10.1016/0092-8674(95)90352-6
- Cooper, K. L., Hu, J. K.-H., ten Berge, D., Fernandez-Teran, M., Ros, M. A. and Tabin, C. J. (2011). Initiation of proximal-distal patterning in the vertebrate limb by signals and growth. *Science* **332**, 1083-1086. doi:10.1126/science.1199499
- Cotney, J., Leng, J., Oh, S., DeMare, L. E., Reilly, S. K., Gerstein, M. B. and Noonan, J. P. (2012). Chromatin state signatures associated with tissue-specific gene expression and enhancer activity in the embryonic limb. *Genome Res.* **22**, 1069-1080. doi:10.1101/gr.129817.111
- Cotney, J., Leng, J., Yin, J., Reilly, S. K., DeMare, L. E., Emera, D., Ayoub, A. E., Rakic, P. and Noonan, J. P. (2013). The evolution of lineage-specific regulatory activities in the human embryonic limb. *Cell* **154**, 185-196. doi:10.1016/j.cell.2013.05.056
- Cox, B. D., Yun, M. H. and Poss, K. D. (2019). Can laboratory model systems instruct human limb regeneration? *Development* **146**, dev181016. doi:10.1242/dev.181016
- Cunningham, T. J., Zhao, X., Sandell, L. L., Evans, S. M., Trainor, P. A. and Duester, G. (2013). Antagonism between retinoic acid and fibroblast growth factor signaling during limb development. *Cell Rep.* **3**, 1503-1511. doi:10.1016/j.celrep.2013.03.036
- Cunningham, T. J., Lancman, J. J., Berenguer, M., Dong, P. D. S. and Duester, G. (2018). Genomic knockout of two presumed forelimb Tbx5 enhancers reveals they are nonessential for limb development. *Cell Rep.* **23**, 3146-3151. doi:10.1016/j.celrep.2018.05.052
- Dahn, R. D. and Fallon, J. F. (2000). Interdigital regulation of digit identity and homeotic transformation by modulated BMP signaling. *Science* **289**, 438-441. doi:10.1126/science.289.5478.438
- Delgado, I. and Torres, M. (2016). Gradients, waves and timers, an overview of limb patterning models. *Semin. Cell Dev. Biol.* **49**, 109-115. doi:10.1016/j.semdcb.2015.12.016
- Delgado, I., López-Delgado, A. C., Roselló-Díez, A., Giovinazzo, G., Cadenas, V., Fernández-de-Manuel, L., Sánchez-Cabo, F., Anderson, M. J., Lewandoski, M. and Torres, M. (2020). Proximo-distal positional information encoded by an Fgf-regulated gradient of homeodomain transcription factors in the vertebrate limb. *Sci. Adv.* **6**, 2375-2548. doi:10.1126/sciadv.aaz0742
- DeVeale, B., Brokxman, I., Mohseni, P., Babak, T., Yoon, C., Lin, A., Onishi, K., Tomilin, A., Pevny, L., Zandstra, P. W. et al. (2013). Oct4 is required ~E7.5 for proliferation in the primitive streak. *PLoS Genet.* **9**, e1003957. doi:10.1371/journal.pgen.1003957
- Drossopoulou, G., Lewis, K. E., Sanz-Ezquerro, J. J., Nikbakht, N., McMahon, A. P., Hofmann, C. and Tickle, C. (2000). A model for anteroposterior patterning of the vertebrate limb based on sequential long- and short-range Shh signalling and Bmp signalling. *Development* **127**, 1337-1348.
- Duboc, V. and Logan, M. P. O. (2011). Pitx1 is necessary for normal initiation of hindlimb outgrowth through regulation of Tbx4 expression and shapes hindlimb morphologies via targeted growth control. *Development* **138**, 5301-5309. doi:10.1242/dev.074153
- Elisa Piedra, M., Borja Rivero, F., Fernandez-Teran, M. and Ros, M. A. (2000). Pattern formation and regulation of gene expressions in chick recombinant limbs. *Mech. Dev.* **90**, 167-179. doi:10.1016/S0925-4773(99)00247-6
- Gao, B., Ajima, R., Yang, W., Li, C. Y., Song, H., Anderson, M. J., Liu, R. R., Lewandoski, M. B., Yamaguchi, T. P. and Yang, Y. Z. (2018). Coordinated directional outgrowth and pattern formation by integration of Wnt5a and Fgf signaling in planar cell polarity. *Development* **145**, dev163824. doi:10.1242/dev.163824
- Gros, J. and Tabin, C. J. (2014). Vertebrate limb bud formation is initiated by localized epithelial-to-mesenchymal transition. *Science* **343**, 1253-1256. doi:10.1126/science.1248228
- Gros, J., Hu, J. K.-H., Vinegoni, C., Feruglio, P. F., Weissleder, R. and Tabin, C. J. (2010). WNT5A/JNK and FGF/MAPK pathways regulate the cellular events shaping the vertebrate limb bud. *Curr. Biol.* **20**, 1993-2002. doi:10.1016/j.cub.2010.09.063

- Harfe, B. D., Scherz, P. J., Nissim, S., Tian, H., McMahon, A. P. and Tabin, C. J. (2004). Evidence for an expansion-based temporal Shh gradient in specifying vertebrate digit identities. *Cell* **118**, 517-528. doi:10.1016/j.cell.2004.07.024
- Haro, E., Delgado, I., Junco, M., Yamada, Y., Mansouri, A., Oberg, K. C., Ros, M. A. and Lewandoski, M. (2014). Sp6 and Sp8 transcription factors control AER formation and dorsal-ventral patterning in limb development. *PLoS Genet.* **10**, e1004468. doi:10.1371/journal.pgen.1004468
- Haro, E., Watson, B. A., Feenstra, J. M., Tegeler, L., Pira, C. U., Mohan, S. and Oberg, K. C. (2017). Lmx1b-targeted cis-regulatory modules involved in limb dorsalization. *Development* **144**, 2009-2020. doi:10.1242/dev.146332
- Hayashi, S., Akiyama, R., Wong, J., Tahara, N., Kawakami, H. and Kawakami, Y. (2016). Gata6-dependent Gli3 repressor function is essential in anterior limb progenitor cells for proper limb development. *PLoS Genet.* **12**, e1006138. doi:10.1371/journal.pgen.1006138
- Heintzelman, K. F., Phillips, H. M. and Davis, G. S. (1978). Liquid-tissue behavior and differential cohesiveness during chick limb budding. *J. Embryol. Exp. Morphol.* **47**, 1-15.
- Ide, H., Wada, N. and Uchiyama, K. (1994). Sorting out of cells from different parts and stages of the chick limb bud. *Dev. Biol.* **162**, 71-76. doi:10.1006/dbio.1994.1067
- Itou, J., Kawakami, H., Quach, T., Osterwalder, M., Evans, S. M., Zeller, R. and Kawakami, Y. (2012). Islet1 regulates establishment of the posterior hindlimb field upstream of the Hand2-Shh morphoregulatory gene network in mouse embryos. *Development* **139**, 1620-1629. doi:10.1242/dev.073056
- Jain, D., Nemeč, S., Luxey, M., Gauthier, Y., Bemmo, A., Balsalobre, A. and Drouin, J. (2018). Regulatory integration of Hox factor activity with T-box factors in limb development. *Development* **145**, dev159830. doi:10.1242/dev.159830
- Jurberg, A. D., Aires, R., Varela-Lasheras, I., NÓvoa, A. and Mallo, M. (2013). Switching axial progenitors from producing trunk to tail tissues in vertebrate embryos. *Dev. Cell* **25**, 451-462. doi:10.1016/j.devcel.2013.05.009
- Kawakami, Y., Capdevila, J., Büscher, D., Itoh, T., Esteban, C. R. and Belmonte, J. C. I. (2001). WNT signals control FGF-dependent limb initiation and AER induction in the chick embryo. *Cell* **104**, 891-900. doi:10.1016/S0092-8674(01)00285-9
- Kawakami, Y., Marti, M., Kawakami, H., Itou, J., Quach, T., Johnson, A., Sahara, S., O'Leary, D. D. M., Nakagawa, Y., Lewandoski, M. et al. (2011). Islet1-mediated activation of the beta-catenin pathway is necessary for hindlimb initiation in mice. *Development* **138**, 4465-4473. doi:10.1242/dev.065359
- Kherdjemil, Y., Lalonde, R. L., Sheth, R., Dumouchel, A., de Martino, G., Pineault, K. M., Wellik, D. M., Stadler, H. S., Akimenko, M.-A. and Kmita, M. (2016). Evolution of Hoxa11 regulation in vertebrates is linked to the pentadactyl state. *Nature* **539**, 89. doi:10.1038/nature19813
- Knosp, W. M., Scott, V., Bachinger, H. P. and Stadler, H. S. (2004). HOXA13 regulates the expression of bone morphogenetic proteins 2 and 7 to control distal limb morphogenesis. *Development* **131**, 4581-4592. doi:10.1242/dev.01327
- Kozhemyakina, E., Ionescu, A. and Lassar, A. B. (2014). GATA6 is a crucial regulator of Shh in the limb bud. *PLoS Genet.* **10**, e1004072. doi:10.1371/journal.pgen.1004072
- Kragestein, B. K., Spielmann, M., Paliou, C., Heinrich, V., Schöpflin, R., Esposito, A., Annunziatella, C., Bianco, S., Chiariello, A. M., Jerković, I. et al. (2018). Dynamic 3D chromatin architecture contributes to enhancer specificity and limb morphogenesis. *Nat. Genet.* **50**, 1463. doi:10.1038/s41588-018-0221-x
- Langston, A. W. and Gudas, L. J. (1994). Retinoic acid and homeobox gene-regulation. *Curr. Opin. Genet. Dev.* **4**, 550-555. doi:10.1016/0959-437X(94)90071-A
- Lee, Y. J., McPherron, A., Choe, S., Sakai, Y., Chandraratna, R. A., Lee, S.-J. and Oh, S. P. (2010). Growth differentiation factor 11 signaling controls retinoic acid activity for axial vertebral development. *Dev. Biol.* **347**, 195-203. doi:10.1016/j.ydbio.2010.08.022
- Lettice, L. A., Williamson, I., Wiltshire, J. H., Peluso, S., Devenney, P. S., Hill, A. E., Essafi, A., Hagman, J., Mort, R., Grimes, G. et al. (2012). Opposing functions of the ETS factor family define Shh spatial expression in limb buds and underlie polydactyly. *Dev. Cell* **22**, 459-467. doi:10.1016/j.devcel.2011.12.010
- Lettice, L. A., Devenney, P., De Angelis, C. and Hill, R. E. (2017). The conserved Sonic hedgehog limb enhancer consists of discrete functional elements that regulate precise spatial expression. *Cell Rep.* **20**, 1396-1408. doi:10.1016/j.celrep.2017.07.037
- Lewandoski, J. P., Du, F., Zhang, S. L., Powell, M. B., Falkenstein, K. N., Ji, H. K. and Vokes, S. A. (2015). Spatiotemporal regulation of Gli target genes in the mammalian limb bud. *Dev. Biol.* **406**, 92-103. doi:10.1016/j.ydbio.2015.07.022
- Li, S. and Muneoka, K. (1999). Cell migration and chick limb development: chemotactic action of FGF-4 and the AER. *Dev. Biol.* **211**, 335-347. doi:10.1006/dbio.1999.9317
- Li, D. Y., Sakuma, R., Vakili, N. A., Mo, R., Puviindran, V., Deimling, S., Zhang, X. Y., Hopyan, S. and Hui, C. C. (2014). Formation of proximal and anterior limb skeleton requires early function of Irx3 and Irx5 and is negatively regulated by Shh signaling. *Dev. Cell* **29**, 233-240. doi:10.1016/j.devcel.2014.03.001
- Litingtung, Y., Dahn, R. D., Li, Y., Fallon, J. F. and Chiang, C. (2002). Shh and Gli3 are dispensable for limb skeleton formation but regulate digit number and identity. *Nature* **418**, 979-983. doi:10.1038/nature01033
- Loomis, C. A., Harris, E., Michaud, J., Wurst, W., Hanks, M. and Joyner, A. L. (1996). The mouse Engrailed-1 gene and ventral limb patterning. *Nature* **382**, 360-363. doi:10.1038/382360a0
- McCabe, J. A., Errick, J. and Saunders, J. W. Jr. (1974). Ectodermal control of the dorsoventral axis in the leg bud of the chick embryo. *Dev. Biol.* **39**, 69-82. doi:10.1016/S0012-1606(74)80009-6
- Mallo, M. (2018). Reassessing the role of Hox genes during vertebrate development and evolution. *Trends Genet.* **34**, 209-217. doi:10.1016/j.tig.2017.11.007
- Mariani, F. V., Ahn, C. P. and Martin, G. R. (2008). Genetic evidence that FGFs have an instructive role in limb proximal-distal patterning. *Nature* **453**, 401-405. doi:10.1038/nature06876
- Matsubara, Y., Hirasawa, T., Egawa, S., Hattori, A., Suganuma, T., Kohara, Y., Nagai, T., Tamura, K., Kuratani, S., Kuroiwa, A. et al. (2017). Anatomical integration of the sacral-hindlimb unit coordinated by GDF11 underlies variation in hindlimb positioning in tetrapods. *Nat. Ecol. Evol.* **1**, 1392-1399. doi:10.1038/s41559-017-0247-y
- McPherron, A. C., Lawler, A. M. and Lee, S.-J. (1999). Regulation of anterior/posterior patterning of the axial skeleton by growth/differentiation factor 11. *Nat. Genet.* **22**, 260-264. doi:10.1038/10320
- Mercader, N., Leonardo, E., Azpiazu, N., Serrano, A., Morata, G., Martínez-A, C. and Torres, M. (1999). Conserved regulation of proximodistal limb axis development by Meis1/Hth. *Nature* **402**, 425-429. doi:10.1038/46580
- Mercader, N., Leonardo, E., Piedra, M. E., Martínez, A. C., Ros, M. A. and Torres, M. (2000). Opposing RA and FGF signals control proximodistal vertebrate limb development through regulation of Meis genes. *Development* **127**, 3961-3970.
- Michaud, J. L., Lapointe, F. and LeDouarin, N. M. (1997). The dorsoventral polarity of the presumptive limb is determined by signals produced by the somites and by the lateral somatopleure. *Development* **124**, 1453-1463.
- Min, H., Danilenko, D. M., Scully, S. A., Bolon, B., Ring, B. D., Tarpley, J. E., DeRose, M. and Simonet, W. S. (1998). Fgf-10 is required for both limb and lung development and exhibits striking functional similarity to Drosophila branchless. *Gene Dev.* **12**, 3156-3161. doi:10.1101/gad.12.20.3156
- Minguillon, C., Del Buono, J. and Logan, M. P. (2005). Tbx5 and Tbx4 are not sufficient to determine limb-specific morphologies but have common roles in initiating limb outgrowth. *Dev. Cell* **8**, 75-84. doi:10.1016/j.devcel.2004.11.013
- Minguillon, C., Nishimoto, S., Wood, S., Vendrell, E., Gibson-Brown, J. J. and Logan, M. P. O. (2012). Hox genes regulate the onset of Tbx5 expression in the forelimb. *Development* **139**, 3180-3188. doi:10.1242/dev.084814
- Moreau, C., Caldarelli, P., Rocancourt, D., Roussel, J., Denans, N., Pourquie, O. and Gros, J. (2019). Timed collinear activation of Hox genes during gastrulation controls the avian forelimb position. *Curr. Biol.* **29**, 35-50.e4. doi:10.1016/j.cub.2018.11.009
- Nardi, J. B. and Stocum, D. L. (1984). Surface properties of regenerating limb cells: evidence for gradation along the proximodistal axis. *Differentiation* **25**, 27-31. doi:10.1111/j.1432-0436.1984.tb01334.x
- Nemeč, S., Luxey, M., Jain, D., Sung, A. H., Pastinen, T. and Drouin, J. (2017). Pitx1 directly modulates the core limb development program to implement hindlimb identity. *Development* **144**, 3325-3335. doi:10.1242/dev.154864
- Newman, S. A. and Frisch, H. L. (1979). Dynamics of skeletal pattern formation in developing chick limb. *Science* **205**, 662-668. doi:10.1126/science.462174
- Ng, J. K., Kawakami, Y., Buscher, D., Raya, A., Itoh, T., Koth, C. M., Esteban, C. R., Rodriguez-Leon, J., Garrity, D. M., Fishman, M. C. et al. (2002). The limb identity gene Tbx5 promotes limb initiation by interacting with Wnt2b and Fgf10. *Development* **129**, 5161-5170.
- Niederreither, K., Vermot, J., Schuhbauer, B., Chambon, P. and Dolle, P. (2002). Embryonic retinoic acid synthesis is required for forelimb growth and anteroposterior patterning in the mouse. *Development* **129**, 3563-3574.
- Nishimoto, S., Minguillon, C., Wood, S. and Logan, M. P. O. (2014). A combination of activation and repression by a colinear Hox code controls forelimb-restricted expression of Tbx5 and reveals Hox protein specificity. *PLoS Genet.* **10**, e1004245. doi:10.1371/journal.pgen.1004245
- Nishimoto, S., Wilde, S. M., Wood, S. and Logan, M. P. O. (2015). RA acts in a coherent feed-forward mechanism with Tbx5 to control limb bud induction and initiation. *Cell Rep.* **12**, 879-891. doi:10.1016/j.celrep.2015.06.068
- Ohuchi, H., Nakagawa, T., Yamamoto, A., Araga, A., Ohata, T., Ishimaru, Y., Yoshioka, H., Kuwana, T., Nohno, T., Yamasaki, M. et al. (1997). The mesenchymal factor, FGF10, initiates and maintains the outgrowth of the chick limb bud through interaction with FGF8, an apical ectodermal factor. *Development* **124**, 2235-2244.
- Oster, G. F., Murray, J. D. and Harris, A. K. (1983). Mechanical aspects of mesenchymal morphogenesis. *J. Embryol. Exp. Morphol.* **78**, 83-125.
- Parr, B. A. and McMahon, A. P. (1995). Dorsalizing signal Wnt-7a required for normal polarity of D-V and A-P axes of mouse limb. *Nature* **374**, 350-353. doi:10.1038/374350a0
- Pautou, M. P. (1973). Morphogenesis of the feet of birds using interspecific cellular mixtures. I. Morphological study. *J. Embryol. Exp. Morphol.* **29**, 175-196.

- Pearse, R. V., II, Scherz, P. J., Campbell, J. K. and Tabin, C. J.** (2007). A cellular lineage analysis of the chick limb bud. *Dev. Biol.* **310**, 388-400. doi:10.1016/j.ydbio.2007.08.002
- Pickering, J. and Towers, M.** (2014). *Molecular Genetics of Human Congenital Limb Malformations*. Chichester: eLS John Wiley and Sons Ltd.
- Pickering, J. and Towers, M.** (2016). Inhibition of Shh signalling in the chick wing gives insights into digit patterning and evolution. *Development* **143**, 3514-3521. doi:10.1242/dev.137398
- Pickering, J., Rich, C. A., Stainton, H., Aceituno, C., Chinnaiya, K., Saiz-Lopez, P., Ros, M. A. and Towers, M.** (2018). An intrinsic cell cycle timer terminates limb bud outgrowth. *eLife* **7**, e37429. doi:10.7554/eLife.37429
- Pickering, J., Chinnaiya, K. and Towers, M.** (2019). An autoregulatory cell cycle timer integrates growth and specification in chick wing digit development. *eLife* **8**, e47625. doi:10.7554/eLife.47625
- Pizette, S., Abate-Shen, C. and Niswander, L.** (2001). BMP controls proximodistal outgrowth, via induction of the apical ectodermal ridge, and dorsoventral patterning in the vertebrate limb. *Development* **128**, 4463-4474.
- Rancourt, D. E., Tsuzuki, T. and Capecchi, M. R.** (1995). Genetic interaction between Hoxb-5 and Hoxb-6 is revealed by nonallelic noncomplementation. *Gene Dev.* **9**, 108-122. doi:10.1101/gad.9.1.108
- Raspopovic, J., Marcon, L., Russo, L. and Sharpe, J.** (2014). Modeling digits. Digit patterning is controlled by a Bmp-Sox9-Wnt Turing network modulated by morphogen gradients. *Science* **345**, 566-570. doi:10.1126/science.1252960
- Riddle, R. D., Johnson, R. L., Laufer, E. and Tabin, C.** (1993). Sonic hedgehog mediates the polarizing activity of the ZPA. *Cell* **75**, 1401-1416. doi:10.1016/0092-8674(93)90626-2
- Riddle, R. D., Ensign, M., Nelson, C., Tsuchida, T., Jessell, T. M. and Tabin, C.** (1995). Induction of the limb homeobox gene Lmx1 by Wnt6a establishes dorsoventral pattern in the vertebrate limb. *Cell* **83**, 631-640. doi:10.1016/0092-8674(95)90103-5
- Rodríguez-Carballo, E., Lopez-Delisle, L., Yakushiji-Kaminatsui, N., Ullate-Agote, A. and Duboule, D.** (2019). Impact of genome architecture on the functional activation and repression of Hox regulatory landscapes. *BMC Biol.* **17**, 55. doi:10.1186/s12915-019-0677-x
- Ros, M. A., Dahn, R. D., Fernandez-Teran, M., Rashka, K., Caruccio, N. C., Hasso, S. M., Bitgood, J. J., Lancman, J. J. and Fallon, J. F.** (2003). The chick *oligozeugodactyly* (*ozd*) mutant lacks sonic hedgehog function in the limb. *Development* **130**, 527-537. doi:10.1242/dev.00245
- Rosello-Diez, A., Ros, M. A. and Torres, M.** (2011). Diffusible signals, not autonomous mechanisms, determine the main proximodistal limb subdivision. *Science* **332**, 1086-1088. doi:10.1126/science.1199489
- Rosello-Diez, A., Arques, C. G., Delgado, I., Giovino, G. and Torres, M.** (2014). Diffusible signals and epigenetic timing cooperate in late proximo-distal limb patterning. *Development* **141**, 1534-1543. doi:10.1242/dev.106831
- Rosenquist, G. C.** (1971). The origin and movement of the limb-bud epithelium and mesenchyme in the chick embryo as determined by radioautographic mapping. *J. Embryol. Exp. Morphol.* **25**, 85-96.
- Saito, D., Yonei-Tamura, S., Kano, K., Ide, H. and Tamura, K.** (2002). Specification and determination of limb identity: evidence for inhibitory regulation of Tbx gene expression. *Development* **129**, 211-220.
- Saiz-Lopez, P., Chinnaiya, K., Campa, V. M., Delgado, I., Ros, M. A. and Towers, M.** (2015). An intrinsic timer specifies distal structures of the vertebrate limb. *Nat. Commun.* **6**, 8108. doi:10.1038/ncomms9108
- Saiz-Lopez, P., Chinnaiya, K., Towers, M. and Ros, M. A.** (2017). Intrinsic properties of limb bud cells can be differentially reset. *Development* **144**, 479-486. doi:10.1242/dev.137661
- Salsi, V. and Zappavigna, V.** (2006). Hoxd13 and Hoxa13 directly control the expression of the EphA7 Ephrin tyrosine kinase receptor in developing limbs. *J. Biol. Chem.* **281**, 1992-1999. doi:10.1074/jbc.M510900200
- Salsi, V., Vigano, M. A., Cocchiarella, F., Mantovani, R. and Zappavigna, V.** (2008). Hoxd13 binds in vivo and regulates the expression of genes acting in key pathways for early limb and skeletal patterning. *Dev. Biol.* **317**, 497-507. doi:10.1016/j.ydbio.2008.02.048
- Sanders, T. A., Llagostera, E. and Barna, M.** (2013). Specialized filopodia direct long-range transport of SHH during vertebrate tissue patterning. *Nature* **497**, 628-632. doi:10.1038/nature12157
- Sanz-Ezquerro, J. J. and Tickle, C.** (2000). Autoregulation of Shh expression and Shh induction of cell death suggest a mechanism for modulating polarising activity during chick limb development. *Development* **127**, 4811-4823.
- Sanz-Ezquerro, J. J. and Tickle, C.** (2003). Fgf signaling controls the number of phalanges and tip formation in developing digits. *Curr. Biol.* **13**, 1830-1836. doi:10.1016/j.cub.2003.09.040
- Saunders, J. W. Jr.** (1948). The proximo-distal sequence of origin of the parts of the chick wing and the role of the ectoderm. *J. Exp. Zool.* **282**, 628-668. doi:10.1002/(SICI)1097-010X(19981215)282:6<628::AID-JEZ2>3.0.CO;2-N
- Saunders, J. W. and Gasseling, M. T.** (1968). Ectodermal-mesenchymal interactions in the origin of limb symmetry. In *Mesenchymal-epithelial Interactions* (ed. R. Fleischmeyer and R. E. Billingham), pp. 78-97. Baltimore: Williams and Wilkins.
- Saxena, A., Towers, M. and Cooper, K. L.** (2017). The origins, scaling and loss of tetrapod digits. *Philos. Trans. R. Soc. Lond. Biol. Sci.* **372**, 1713. doi:10.1098/rstb.2015.0482
- Searls, R. L. and Janners, M. Y.** (1971). The initiation of limb bud outgrowth in the embryonic chick. *Dev. Biol.* **24**, 198-213. doi:10.1016/0012-1606(71)90095-9
- Sekine, K., Ohuchi, H., Fujiwara, M., Yamasaki, M., Yoshizawa, T., Sato, T., Yagishita, N., Matsui, D., Koga, Y., Itoh, N. et al.** (1999). Fgf10 is essential for limb and lung formation. *Nat. Genet.* **21**, 138-141. doi:10.1038/5096
- Sheeba, C. J. and Logan, M. P. O.** (2017). The roles of T-Box genes in vertebrate limb development. *Curr. Top. Dev. Biol.* **122**, 355-381. doi:10.1016/bs.ctdb.2016.08.009
- Sheth, R., Marcon, L., Bastida, M. F., Junco, M., Quintana, L., Dahn, R., Kmita, M., Sharpe, J. and Ros, M. A.** (2012). Hox genes regulate digit patterning by controlling the wavelength of a Turing-type mechanism. *Science* **338**, 1476-1480. doi:10.1126/science.1226804
- Stadler, H. S., Higgins, K. M. and Capecchi, M. R.** (2001). Loss of Eph-receptor expression correlates with loss of cell adhesion and chondrogenic capacity in Hoxa13 mutant limbs. *Development* **128**, 4177-4188.
- Stratford, T., Horton, C. and Maden, M.** (1996). Retinoic acid is required for the initiation of outgrowth in the chick limb bud. *Curr. Biol.* **6**, 1124-1133. doi:10.1016/S0960-9822(02)70679-9
- Summerbell, D., Lewis, J. H. and Wolpert, L.** (1973). Positional information in chick limb morphogenesis. *Nature* **244**, 492-496. doi:10.1038/244492a0
- Suzuki, T., Takeuchi, J., Koshiba-Takeuchi, K. and Ogura, T.** (2004). Tbx genes specify posterior digit identity through Shh and BMP signaling. *Dev. Cell* **6**, 43-53. doi:10.1016/S1534-5807(03)00401-5
- Suzuki, T., Hasso, S. M. and Fallon, J. F.** (2008). Unique SMAD1/5/8 activity at the phalanx-forming region determines digit identity. *Proc. Natl. Acad. Sci. USA* **105**, 4185-4190. doi:10.1073/pnas.0707899105
- te Welscher, P., Fernandez-Teran, M., Ros, M. A. and Zeller, R.** (2002a). Mutual genetic antagonism involving GLI3 and dHAND prepatterns the vertebrate limb bud mesenchyme prior to SHH signaling. *Genes Dev.* **16**, 421-426. doi:10.1101/gad.219202
- te Welscher, P., Zuniga, A., Kuijper, S., Drenth, T., Goedemans, H. J., Meijlink, F. and Zeller, R.** (2002b). Progression of vertebrate limb development through SHH-mediated counteraction of GLI3. *Science* **298**, 827-830. doi:10.1126/science.1075620
- Tickle, C.** (2015). How the embryo makes a limb: determination, polarity and identity. *J. Anat.* **227**, 418-430. doi:10.1111/joa.12361
- Tickle, C. and Towers, M.** (2017). Sonic Hedgehog signaling in limb development. *Front. Cell Dev. Biol.* **5**, 14. doi:10.3389/fcell.2017.00014
- Tickle, C., Summerbell, D. and Wolpert, L.** (1975). Positional signalling and specification of digits in chick limb morphogenesis. *Nature* **254**, 199-202. doi:10.1038/254199a0
- Towers, M.** (2018). Evolution of antero-posterior patterning of the limb: Insights from the chick. *Genesis* **56**, e23047. doi:10.1002/dvg.23047
- Towers, M., Mahood, R., Yin, Y. and Tickle, C.** (2008). Integration of growth and specification in chick wing digit-patterning. *Nature* **452**, 882-886. doi:10.1038/nature06718
- Towers, M., Signolet, J., Sherman, A., Sang, H. and Tickle, C.** (2011). Insights into bird wing evolution and digit specification from polarizing region fate maps. *Nat. Commun.* **2**, 426. doi:10.1038/ncomms1437
- van den Akker, E., Fromental-Ramain, C., de Graaff, W., Le Mouellic, H., Brulet, P., Chambon, P. and Deschamps, J.** (2001). Axial skeletal patterning in mice lacking all paralogous group 8 Hox genes. *Development* **128**, 1911-1921.
- Vargesson, N.** (2020). Positional Information—a concept underpinning our understanding of developmental biology. *Dev. Dyn.* **249**, 298-312. doi:10.1002/dvdy.116
- Vargesson, N., Kostakopoulou, K., Drossopoulou, G., Papageorgiou, S. and Tickle, C.** (2001). Characterisation of hoxa gene expression in the chick limb bud in response to FGF. *Dev. Dyn.* **220**, 87-90. doi:10.1002/1097-0177(2000)9999:9999::AID-DVDY1083>3.0.CO;2-E
- Vogel, A., Rodriguez, C., Warnken, W. and Belmonte, J. C. I.** (1995). Dorsal cell fate specified by chick Lmx1 during vertebrate limb development. *Nature* **378**, 716-720. doi:10.1038/378716a0
- Vokes, S. A., Ji, H., Wong, W. H. and McMahon, A. P.** (2008). A genome-scale analysis of the cis-regulatory circuitry underlying sonic hedgehog-mediated patterning of the mammalian limb. *Gene Dev.* **22**, 2651-2663. doi:10.1101/gad.1693008
- Wada, N. and Ide, H.** (1994). Sorting out of limb bud cells in monolayer culture. *Int. J. Dev. Biol.* **38**, 351-356.
- Wilby, O. K. and Ede, D. A.** (1975). A model generating the pattern of cartilage skeletal elements in the embryonic chick limb. *J. Theoret. Biol.* **52**, 199-217. doi:10.1016/0022-5193(75)90051-X
- Williamson, I., Lettice, L. A., Hill, R. E. and Bickmore, W. A.** (2016). Shh and ZRS enhancer colocalisation is specific to the zone of polarising activity. *Development* **143**, 2994-3001. doi:10.1242/dev.139188
- Wolpert, L.** (1969). Positional information and the spatial pattern of cellular differentiation. *J. Theoret. Biol.* **25**, 1-47. doi:10.1016/S0022-5193(69)80016-0

- Wyngaarden, L. A., Vogeli, K. M., Ciruna, B. G., Wells, M., Hadjantonakis, A.-K. and Hopyan, S. (2010). Oriented cell motility and division underlie early limb bud morphogenesis. *Development* **137**, 2551-2558. doi:10.1242/dev.046987
- Xu, B. and Wellik, D. M. (2011). Axial Hox9 activity establishes the posterior field in the developing forelimb. *Proc. Natl. Acad. Sci. USA* **108**, 4888-4891. doi:10.1073/pnas.1018161108
- Xu, X., Weinstein, M., Li, C., Naski, M., Cohen, R. I., Ornitz, D. M., Leder, P. and Deng, C. (1998). Fibroblast growth factor receptor 2 (FGFR2)-mediated reciprocal regulation loop between FGF8 and FGF10 is essential for limb induction. *Development* **125**, 753-765.
- Xu, B., Hrycaj, S. M., McIntyre, D. C., Baker, N. C., Takeuchi, J. K., Jeannotte, L., Gaber, Z. B., Novitch, B. G. and Wellik, D. M. (2013). Hox5 interacts with Plzf to restrict Shh expression in the developing forelimb. *Proc. Natl. Acad. Sci. USA* **110**, 19438-19443. doi:10.1073/pnas.1315075110
- Yang, Y., Drossopoulou, G., Chuang, P. T., Duprez, D., Marti, E., Bumcrot, D., Vargesson, N., Clarke, J., Niswander, L., McMahon, A. et al. (1997). Relationship between dose, distance and time in Sonic Hedgehog-mediated regulation of anteroposterior polarity in the chick limb. *Development* **124**, 4393-4404.
- Zakany, J. and Duboule, D. (2007). The role of Hox genes during vertebrate limb development. *Curr. Opin. Genet. Dev.* **17**, 359-366. doi:10.1016/j.gde.2007.05.011
- Zhu, J., Nakamura, E., Nguyen, M.-T., Bao, X., Akiyama, H. and Mackem, S. (2008). Uncoupling Sonic hedgehog control of pattern and expansion of the developing limb bud. *Dev. Cell* **14**, 624-632. doi:10.1016/j.devcel.2008.01.008
- Zhu, J., Trofka, A., Harfe, B. D. and Mackem, S. (2020). Sonic Hedgehog is not a limb morphogen but acts as a trigger to specify all digits. *bioRxiv*, 2020.05.28.122119. doi:10.1101/2020.05.28.122119
- Zuniga, A., Haramis, A. P., McMahon, A. P. and Zeller, R. (1999). Signal relay by BMP antagonism controls the SHH/FGF4 feedback loop in vertebrate limb buds. *Nature* **401**, 598-602. doi:10.1038/44157
- Zwilling, E. (1964). Development of fragmented and of dissociated limb bud mesoderm. *Dev. Biol.* **9**, 20-37. doi:10.1016/0012-1606(64)90012-0
